# Supplementary material for: A cross-cohort computational framework to trace tumor tissue-of-origin based on RNA sequencing
Source: PubMed Central journal article supplement (PMC10505149; doi:10.1038/s41598-023-42465-8), 2023-09-16
Supplement: 41598_2023_42465_MOESM2_ESM.pdf [file 41598_2023_42465_MOESM2_ESM.pdf]

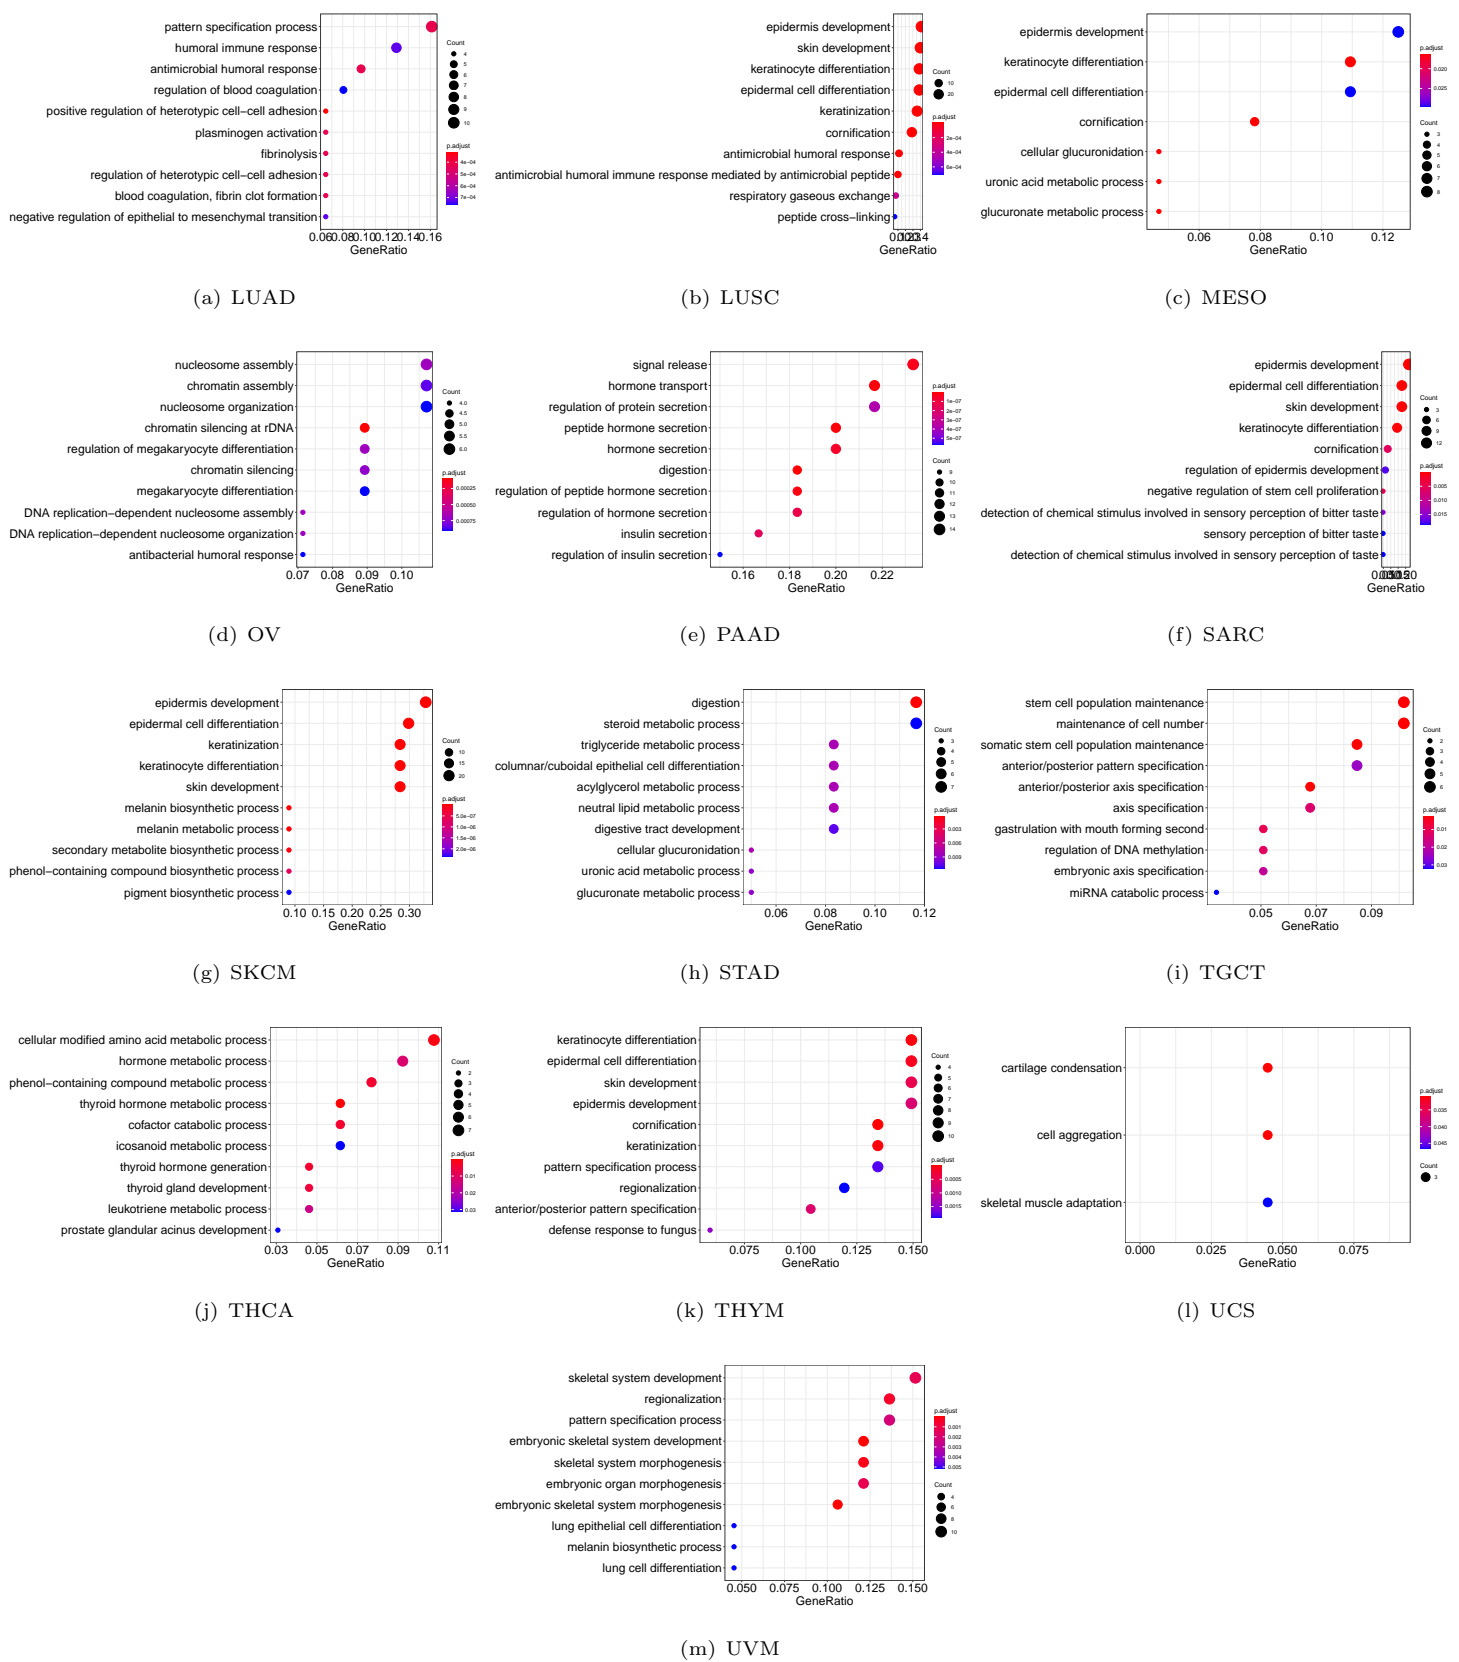

Supplementary Figure 2. Biological process enrichments for select gene sets for all cancer types (part 2).
