# Supplementary material for: A cross-cohort computational framework to trace tumor tissue-of-origin based on RNA sequencing
Source: Sci Rep. 2023 Sep 16;13:15356. doi: 10.1038/s41598-023-42465-8 (PMC10505149; doi:10.1038/s41598-023-42465-8)
Supplement: Supplementary file 3 — Supplementary Table 1. [file 41598_2023_42465_MOESM3_ESM.xlsx]

## Sheet: Sheet1
Supplementary Table 1. Cross validation accuracies for combinations for different preprocessing, feature selection and classification methods using the TCGA primary dataset.
	gene number	selection method	classification method	number of estimators (neighbor number for KNN)	Penalty	-v	-V	-s	-y	-z	('ACC', 'precision')	('ACC', 'recall')	('ACC', 'f1-score')	('ACC', 'support')	('ACC', 'specificity')	('ACC', 'auc')	('BLCA', 'precision')	('BLCA', 'recall')	('BLCA', 'f1-score')	('BLCA', 'support')	('BLCA', 'specificity')	('BLCA', 'auc')	('BRCA', 'precision')	('BRCA', 'recall')	('BRCA', 'f1-score')	('BRCA', 'support')	('BRCA', 'specificity')	('BRCA', 'auc')	('CESC', 'precision')	('CESC', 'recall')	('CESC', 'f1-score')	('CESC', 'support')	('CESC', 'specificity')	('CESC', 'auc')	('CHOL', 'precision')	('CHOL', 'recall')	('CHOL', 'f1-score')	('CHOL', 'support')	('CHOL', 'specificity')	('CHOL', 'auc')	('COADREAD', 'precision')	('COADREAD', 'recall')	('COADREAD', 'f1-score')	('COADREAD', 'support')	('COADREAD', 'specificity')	('COADREAD', 'auc')	('DLBC', 'precision')	('DLBC', 'recall')	('DLBC', 'f1-score')
89	80	logistic	logistic	2000	10000	10	1	1.0	LogAndZeroMeanUnitVar()	AsIs()	0.974684	0.974684	0.974684	79	0.999797	0.999952	0.980535	0.97343	0.97697	414	0.999158	0.999776	0.995459	0.994555	0.995007	1102	0.999432	0.999988	0.963576	0.957237	0.960396	304	0.998855	0.998824	0.794118	0.75	0.771429	36	0.999291	0.991466	0.989231	0.998447	0.993818	644	0.999245	0.999984	0.978723	0.958333	0.968421
2	19531	all	logistic	2000	10000	10	1	1.0	LogAndZeroMeanUnitVar()	AsIs()	0.987013	0.962025	0.974359	79	0.999898	0.999843	0.966427	0.97343	0.969916	414	0.998526	0.999724	0.997273	0.995463	0.996367	1102	0.999659	0.99999	0.973064	0.950658	0.96173	304	0.999167	0.998674	0.818182	0.75	0.782609	36	0.999392	0.992557	0.992272	0.996894	0.994578	644	0.99946	0.999978	0.979592	1	0.989691
82	40	logistic	logistic	2000	10000	10	1	1.0	LogAndZeroMeanUnitVar()	AsIs()	0.974359	0.962025	0.968153	79	0.999797	0.99996	0.96875	0.97343	0.971084	414	0.998631	0.999768	0.993648	0.993648	0.993648	1102	0.999205	0.999984	0.963211	0.947368	0.955224	304	0.998855	0.998918	0.8125	0.722222	0.764706	36	0.999392	0.989958	0.990755	0.998447	0.994586	644	0.999353	0.999986	0.958333	0.958333	0.958333
91	80	logistic	svm	2000	10000	10	1	1.0	LogAndZeroMeanUnitVar()	AsIs()	0.987013	0.962025	0.974359	79	0.999898	0.999974	0.973366	0.971014	0.972189	414	0.998842	0.999677	0.995459	0.994555	0.995007	1102	0.999432	0.999968	0.972696	0.9375	0.954774	304	0.999167	0.998775	0.794118	0.75	0.771429	36	0.999291	0.99546	0.990769	1	0.995363	644	0.999353	0.999974	0.978723	0.958333	0.968421
84	40	logistic	svm	2000	10000	10	1	1.0	LogAndZeroMeanUnitVar()	AsIs()	0.987013	0.962025	0.974359	79	0.999898	0.999981	0.966427	0.97343	0.969916	414	0.998526	0.999723	0.99456	0.995463	0.995011	1102	0.999319	0.999957	0.972789	0.940789	0.956522	304	0.999167	0.998946	0.757576	0.694444	0.724638	36	0.99919	0.994301	0.989247	1	0.994595	644	0.999245	0.999975	0.978723	0.958333	0.968421
77	20	logistic	svm	2000	10000	10	1	1.0	LogAndZeroMeanUnitVar()	AsIs()	0.987013	0.962025	0.974359	79	0.999898	0.999992	0.963855	0.966184	0.965018	414	0.998421	0.99967	0.99636	0.993648	0.995002	1102	0.999546	0.999961	0.94702	0.940789	0.943894	304	0.998335	0.999055	0.78125	0.694444	0.735294	36	0.999291	0.992118	0.990769	1	0.995363	644	0.999353	0.999985	0.977778	0.916667	0.946237
75	20	logistic	logistic	2000	10000	10	1	1.0	LogAndZeroMeanUnitVar()	AsIs()	0.975	0.987342	0.981132	79	0.999797	0.999969	0.973039	0.958937	0.965937	414	0.998842	0.999622	0.993654	0.994555	0.994104	1102	0.999205	0.999971	0.959732	0.940789	0.950166	304	0.998751	0.999013	0.833333	0.694444	0.757576	36	0.999494	0.990554	0.989247	1	0.994595	644	0.999245	0.999996	0.957447	0.9375	0.947368
117	19531	all	svm	2000	10000	10	1	1.0	LogAndZeroMeanUnitVar()	AsIs()	0.987013	0.962025	0.974359	79	0.999898	0.999549	0.96368	0.961353	0.962515	414	0.998421	0.99953	0.997268	0.993648	0.995455	1102	0.999659	0.999965	0.969595	0.944079	0.956667	304	0.999063	0.998332	0.738095	0.861111	0.794872	36	0.998886	0.996323	0.989247	1	0.994595	644	0.999245	0.999958	0.979592	1	0.989691
27	800	rf	logistic	2000	10000	10	1	1.0	LogAndZeroMeanUnitVar()	AsIs()	0.987013	0.962025	0.974359	79	0.999898	0.999766	0.96577	0.954106	0.959903	414	0.998526	0.99964	0.996367	0.995463	0.995915	1102	0.999546	0.999978	0.950166	0.940789	0.945455	304	0.998439	0.998201	0.793103	0.638889	0.707692	36	0.999392	0.989592	0.990769	1	0.995363	644	0.999353	0.999987	0.938776	0.958333	0.948454
29	800	rf	svm	2000	10000	10	1	1.0	LogAndZeroMeanUnitVar()	AsIs()	0.987013	0.962025	0.974359	79	0.999898	0.999105	0.970516	0.954106	0.962241	414	0.998736	0.999492	0.99637	0.99637	0.99637	1102	0.999546	0.999893	0.946667	0.934211	0.940397	304	0.998335	0.998351	0.8	0.666667	0.727273	36	0.999392	0.994073	0.986196	0.998447	0.992284	644	0.999029	0.999964	0.978261	0.9375	0.957447
70	10	logistic	svm	2000	10000	10	1	1.0	LogAndZeroMeanUnitVar()	AsIs()	1	0.962025	0.980645	79	1	0.999988	0.951691	0.951691	0.951691	414	0.997894	0.999268	0.988257	0.99274	0.990493	1102	0.998524	0.999918	0.952542	0.924342	0.93823	304	0.998543	0.998801	0.757576	0.694444	0.724638	36	0.99919	0.993817	0.989231	0.998447	0.993818	644	0.999245	0.999979	0.976744	0.875	0.923077
24	400	rf	svm	2000	10000	10	1	1.0	LogAndZeroMeanUnitVar()	AsIs()	0.986842	0.949367	0.967742	79	0.999898	0.999356	0.960784	0.94686	0.953771	414	0.998315	0.999159	0.996367	0.995463	0.995915	1102	0.999546	0.999939	0.95189	0.911184	0.931092	304	0.998543	0.996657	0.735294	0.694444	0.714286	36	0.999089	0.992442	0.986196	0.998447	0.992284	644	0.999029	0.999959	0.978261	0.9375	0.957447
22	400	rf	logistic	2000	10000	10	1	1.0	LogAndZeroMeanUnitVar()	AsIs()	0.987013	0.962025	0.974359	79	0.999898	0.999822	0.959233	0.966184	0.962696	414	0.99821	0.999437	0.994565	0.99637	0.995467	1102	0.999319	0.999978	0.939597	0.921053	0.930233	304	0.998126	0.998007	0.735294	0.694444	0.714286	36	0.999089	0.994979	0.987711	0.998447	0.99305	644	0.999137	0.999987	0.978723	0.958333	0.968421
69	10	logistic	logistic	2000	10000	10	1	1.0	LogAndZeroMeanUnitVar()	AsIs()	0.975	0.987342	0.981132	79	0.999797	0.999991	0.960494	0.939614	0.949939	414	0.998315	0.999271	0.986462	0.991833	0.98914	1102	0.998297	0.999865	0.942953	0.924342	0.933555	304	0.99823	0.998913	0.769231	0.555556	0.645161	36	0.999392	0.989311	0.986217	1	0.993061	644	0.999029	0.999982	0.956522	0.916667	0.93617
39	5	logistic	svm	2000	10000	10	1	1.0	LogAndZeroMeanUnitVar()	AsIs()	1	0.962025	0.980645	79	1	0.99999	0.938725	0.925121	0.931873	414	0.997368	0.99877	0.986364	0.984574	0.985468	1102	0.998297	0.999846	0.912162	0.888158	0.9	304	0.997294	0.99712	0.785714	0.611111	0.6875	36	0.999392	0.990332	0.993798	0.995342	0.994569	644	0.999568	0.999936	0.933333	0.875	0.903226
20	20	logistic	rf	2000	10000	10	1	1.0	LogAndZeroMeanUnitVar()	AsIs()	0.987013	0.962025	0.974359	79	0.999898	0.999311	0.950372	0.925121	0.937576	414	0.997894	0.996851	0.983871	0.99637	0.990081	1102	0.997957	0.999919	0.947183	0.884868	0.914966	304	0.998439	0.996306	0.84	0.583333	0.688525	36	0.999595	0.980225	0.978691	0.998447	0.98847	644	0.998489	0.999845	1	0.979167	0.989474
25	40	logistic	rf	2000	10000	10	1	1.0	LogAndZeroMeanUnitVar()	AsIs()	0.987013	0.962025	0.974359	79	0.999898	0.999891	0.950372	0.925121	0.937576	414	0.997894	0.995912	0.984726	0.994555	0.989616	1102	0.99807	0.999587	0.957895	0.898026	0.926995	304	0.998751	0.997067	0.75	0.666667	0.705882	36	0.99919	0.96612	0.978691	0.998447	0.98847	644	0.998489	0.999905	0.958333	0.958333	0.958333
30	80	logistic	rf	2000	10000	10	1	1.0	LogAndZeroMeanUnitVar()	AsIs()	0.987013	0.962025	0.974359	79	0.999898	0.999791	0.957286	0.92029	0.938424	414	0.99821	0.99718	0.982095	0.995463	0.988734	1102	0.99773	0.999826	0.968085	0.898026	0.931741	304	0.999063	0.995458	0.84	0.583333	0.688525	36	0.999595	0.950527	0.974281	1	0.986973	644	0.998166	0.999918	0.94	0.979167	0.959184
58	800	rf	rf	2000	10000	10	1	1.0	AsIs()	AsIs()	0.962025	0.962025	0.962025	79	0.999695	0.999611	0.945	0.913043	0.928747	414	0.997683	0.996608	0.990045	0.99274	0.991391	1102	0.998751	0.999613	0.944828	0.901316	0.922559	304	0.998335	0.990001	0.689655	0.555556	0.615385	36	0.999089	0.966536	0.978626	0.995342	0.986913	644	0.998489	0.999828	0.979592	1	0.989691
83	40	logistic	knn	5	10000	10	1	1.0	LogAndZeroMeanUnitVar()	AsIs()	0.987013	0.962025	0.974359	79	0.999898	0.981003	0.93932	0.934783	0.937046	414	0.997368	0.987225	0.994531	0.990018	0.992269	1102	0.999319	0.996295	0.917219	0.911184	0.914191	304	0.997398	0.979476	0.814815	0.611111	0.698413	36	0.999494	0.930077	0.93586	0.996894	0.965414	644	0.995252	0.999255	0.9375	0.9375	0.9375
15	10	logistic	rf	2000	10000	10	1	1.0	LogAndZeroMeanUnitVar()	AsIs()	0.974359	0.962025	0.968153	79	0.999797	0.999919	0.9599	0.925121	0.942189	414	0.998315	0.998123	0.984726	0.994555	0.989616	1102	0.99807	0.999906	0.933798	0.881579	0.906937	304	0.998022	0.997292	0.777778	0.583333	0.666667	36	0.999392	0.982308	0.983155	0.996894	0.989977	644	0.998813	0.999929	0.978261	0.9375	0.957447
26	800	rf	rf	2000	10000	10	1	1.0	LogAndZeroMeanUnitVar()	AsIs()	0.974359	0.962025	0.968153	79	0.999797	0.998098	0.94	0.908213	0.923833	414	0.997473	0.996034	0.990942	0.99274	0.99184	1102	0.998865	0.999695	0.958042	0.901316	0.928814	304	0.998751	0.993295	0.724138	0.583333	0.646154	36	0.99919	0.950527	0.977134	0.995342	0.986154	644	0.998381	0.999873	0.959184	0.979167	0.969072
19	200	rf	svm	2000	10000	10	1	1.0	LogAndZeroMeanUnitVar()	AsIs()	1	0.949367	0.974026	79	1	0.998555	0.923261	0.929952	0.926594	414	0.996631	0.998161	0.99095	0.993648	0.992297	1102	0.998865	0.999932	0.934028	0.884868	0.908784	304	0.998022	0.994575	0.78125	0.694444	0.735294	36	0.999291	0.989525	0.978593	0.993789	0.986133	644	0.998489	0.999865	0.978261	0.9375	0.957447
1	19531	all	knn	5	10000	10	1	1.0	LogAndZeroMeanUnitVar()	AsIs()	1	0.962025	0.980645	79	1	0.980998	0.956298	0.898551	0.926526	414	0.99821	0.97751	0.993625	0.990018	0.991818	1102	0.999205	0.9968	0.875758	0.950658	0.911672	304	0.995732	0.98592	0.722222	0.722222	0.722222	36	0.998987	0.916003	0.955291	0.995342	0.974905	644	0.996763	0.999525	0.921569	0.979167	0.949495
21	400	rf	rf	2000	10000	10	1	1.0	LogAndZeroMeanUnitVar()	AsIs()	0.987013	0.962025	0.974359	79	0.999898	0.998347	0.93199	0.89372	0.912454	414	0.997157	0.996849	0.988246	0.991833	0.990036	1102	0.998524	0.999866	0.951049	0.894737	0.922034	304	0.998543	0.99372	0.741935	0.638889	0.686567	36	0.99919	0.964788	0.980153	0.996894	0.988453	644	0.998597	0.999845	0.96	1	0.979592
90	80	logistic	knn	5	10000	10	1	1.0	LogAndZeroMeanUnitVar()	AsIs()	0.974359	0.962025	0.968153	79	0.999797	0.981002	0.955	0.922705	0.938575	414	0.998105	0.982444	0.994536	0.990926	0.992727	1102	0.999319	0.995902	0.945578	0.914474	0.929766	304	0.998335	0.981253	0.766667	0.638889	0.69697	36	0.999291	0.916177	0.923741	0.996894	0.958925	644	0.994281	0.998473	0.94	0.979167	0.959184
28	800	rf	knn	5	10000	10	1	1.0	LogAndZeroMeanUnitVar()	AsIs()	1	0.936709	0.96732	79	1	0.980986	0.967828	0.871981	0.917408	414	0.998736	0.968873	0.990054	0.993648	0.991848	1102	0.998751	0.998052	0.897106	0.917763	0.907317	304	0.996669	0.974439	0.685714	0.666667	0.676056	36	0.998886	0.916006	0.983077	0.992236	0.987635	644	0.998813	0.999761	0.895833	0.895833	0.895833
76	20	logistic	knn	5	10000	10	1	1.0	LogAndZeroMeanUnitVar()	AsIs()	0.962025	0.962025	0.962025	79	0.999695	0.987332	0.93674	0.929952	0.933333	414	0.997262	0.985905	0.995438	0.990018	0.992721	1102	0.999432	0.99771	0.930233	0.921053	0.92562	304	0.997814	0.982883	0.772727	0.472222	0.586207	36	0.999494	0.874467	0.92785	0.998447	0.961855	644	0.994605	0.999415	0.901961	0.958333	0.929293
52	400	rf	rf	2000	10000	10	1	1.0	AsIs()	AsIs()	0.986667	0.936709	0.961039	79	0.999898	0.998507	0.941919	0.900966	0.920988	414	0.997578	0.997167	0.990045	0.99274	0.991391	1102	0.998751	0.999811	0.932143	0.858553	0.893836	304	0.998022	0.992089	0.766667	0.638889	0.69697	36	0.999291	0.994979	0.975573	0.992236	0.983834	644	0.998273	0.99982	0.979592	1	0.989691
0	19531	all	rf	2000	10000	10	1	1.0	LogAndZeroMeanUnitVar()	AsIs()	0.974359	0.962025	0.968153	79	0.999797	0.999332	0.936709	0.89372	0.91471	414	0.997368	0.996423	0.993636	0.991833	0.992734	1102	0.999205	0.999724	0.9375	0.888158	0.912162	304	0.998126	0.991772	0.724138	0.583333	0.646154	36	0.99919	0.978193	0.974125	0.993789	0.983859	644	0.998166	0.999785	0.888889	1	0.941176
5	19531	all	rf	2000	10000	10	1	1.0	AsIs()	AsIs()	0.974026	0.949367	0.961538	79	0.999797	0.997861	0.928934	0.884058	0.905941	414	0.997052	0.996241	0.98645	0.990926	0.988683	1102	0.998297	0.999281	0.931034	0.888158	0.909091	304	0.997918	0.991722	0.733333	0.611111	0.666667	36	0.99919	0.977851	0.977099	0.993789	0.985373	644	0.998381	0.999822	0.90566	1	0.950495
112	800	random_selection	svm	2000	10000	10	1	1.0	LogAndZeroMeanUnitVar()	AsIs()	0.986842	0.949367	0.967742	79	0.999898	0.997869	0.910843	0.913043	0.911942	414	0.996104	0.996389	0.993619	0.989111	0.99136	1102	0.999205	0.999759	0.902685	0.884868	0.893688	304	0.996981	0.995266	0.756757	0.777778	0.767123	36	0.999089	0.990487	0.984592	0.992236	0.988399	644	0.998921	0.999876	0.979167	0.979167	0.979167
18	200	rf	logistic	2000	10000	10	1	1.0	LogAndZeroMeanUnitVar()	AsIs()	0.961039	0.936709	0.948718	79	0.999695	0.997676	0.938875	0.927536	0.933171	414	0.997368	0.998742	0.989189	0.99637	0.992767	1102	0.998638	0.99994	0.918089	0.884868	0.901173	304	0.997502	0.995433	0.766667	0.638889	0.69697	36	0.999291	0.982748	0.980092	0.993789	0.986893	644	0.998597	0.999941	0.92	0.958333	0.938776
10	5	logistic	rf	2000	10000	10	1	1.0	LogAndZeroMeanUnitVar()	AsIs()	0.974359	0.962025	0.968153	79	0.999797	0.999871	0.919118	0.905797	0.912409	414	0.996525	0.996385	0.970667	0.990926	0.980692	1102	0.996254	0.999839	0.923077	0.828947	0.873484	304	0.997814	0.995018	0.826087	0.527778	0.644068	36	0.999595	0.979684	0.981623	0.995342	0.988435	644	0.998705	0.999924	0.97561	0.833333	0.898876
46	200	rf	rf	2000	10000	10	1	1.0	AsIs()	AsIs()	0.986842	0.949367	0.967742	79	0.999898	0.992007	0.928218	0.905797	0.91687	414	0.996946	0.996955	0.984712	0.993648	0.98916	1102	0.99807	0.999891	0.932331	0.815789	0.870175	304	0.998126	0.992608	0.758621	0.611111	0.676923	36	0.999291	0.980352	0.975684	0.996894	0.986175	644	0.998273	0.99985	0.959184	0.979167	0.969072
16	200	rf	rf	2000	10000	10	1	1.0	LogAndZeroMeanUnitVar()	AsIs()	0.973333	0.924051	0.948052	79	0.999797	0.997967	0.921951	0.913043	0.917476	414	0.996631	0.997829	0.99454	0.991833	0.993185	1102	0.999319	0.999795	0.93007	0.875	0.901695	304	0.997918	0.989761	0.7	0.583333	0.636364	36	0.999089	0.967345	0.977029	0.990683	0.983809	644	0.998381	0.999802	0.959184	0.979167	0.969072
36	5	logistic	logistic	2000	10000	10	1	1.0	LogAndZeroMeanUnitVar()	AsIs()	0.987179	0.974684	0.980892	79	0.999898	0.99999	0.919903	0.915459	0.917676	414	0.996525	0.998141	0.982759	0.982759	0.982759	1102	0.997843	0.999717	0.866013	0.871711	0.868852	304	0.995732	0.995749	0.727273	0.444444	0.551724	36	0.999392	0.987578	0.98913	0.98913	0.98913	644	0.999245	0.999911	0.928571	0.8125	0.866667
56	40	logistic	rf	2000	10000	10	1	1.0	AsIs()	AsIs()	0.987013	0.962025	0.974359	79	0.999898	0.99962	0.917949	0.864734	0.890547	414	0.996631	0.995431	0.980304	0.993648	0.986931	1102	0.997503	0.999387	0.951852	0.845395	0.89547	304	0.998647	0.990719	0.714286	0.555556	0.625	36	0.99919	0.977855	0.971212	0.995342	0.983129	644	0.99795	0.999806	0.941176	1	0.969697
62	80	logistic	rf	2000	10000	10	1	1.0	AsIs()	AsIs()	0.986842	0.949367	0.967742	79	0.999898	0.992085	0.944149	0.857488	0.898734	414	0.997789	0.996643	0.97585	0.990018	0.982883	1102	0.996935	0.999549	0.890845	0.832237	0.860544	304	0.996773	0.987825	0.758621	0.611111	0.676923	36	0.999291	0.980828	0.968326	0.996894	0.982402	644	0.997734	0.999781	0.941176	1	0.969697
40	100	rf	rf	2000	10000	10	1	1.0	AsIs()	AsIs()	0.959459	0.898734	0.928105	79	0.999695	0.999536	0.920596	0.896135	0.908201	414	0.996631	0.996571	0.987353	0.991833	0.989588	1102	0.998411	0.99984	0.903704	0.802632	0.850174	304	0.997294	0.98963	0.766667	0.638889	0.69697	36	0.999291	0.95055	0.966667	0.990683	0.978528	644	0.997626	0.999816	0.979167	0.979167	0.979167
50	20	logistic	rf	2000	10000	10	1	1.0	AsIs()	AsIs()	0.987013	0.962025	0.974359	79	0.999898	0.999789	0.903394	0.835749	0.868256	414	0.996104	0.994995	0.975067	0.993648	0.98427	1102	0.996821	0.998719	0.906137	0.825658	0.864028	304	0.997294	0.990468	0.827586	0.666667	0.738462	36	0.999494	0.979422	0.966817	0.995342	0.980872	644	0.997626	0.999759	0.903846	0.979167	0.94
12	100	rf	rf	2000	10000	10	1	1.0	LogAndZeroMeanUnitVar()	AsIs()	0.960526	0.924051	0.941935	79	0.999695	0.998227	0.917476	0.913043	0.915254	414	0.99642	0.995508	0.993654	0.994555	0.994104	1102	0.999205	0.999963	0.932331	0.815789	0.870175	304	0.998126	0.990356	0.653846	0.472222	0.548387	36	0.999089	0.979979	0.976923	0.986025	0.981453	644	0.998381	0.999734	0.93617	0.916667	0.926316
107	800	random_selection	logistic	2000	10000	10	1	1.0	LogAndZeroMeanUnitVar()	AsIs()	0.973684	0.936709	0.954839	79	0.999797	0.999921	0.899761	0.910628	0.905162	414	0.995578	0.996891	0.990036	0.991833	0.990934	1102	0.998751	0.999538	0.896321	0.881579	0.888889	304	0.996773	0.993951	0.705882	0.666667	0.685714	36	0.998987	0.990968	0.979845	0.981366	0.980605	644	0.998597	0.999824	0.978723	0.958333	0.968421
65	10	logistic	knn	5	10000	10	1	1.0	LogAndZeroMeanUnitVar()	AsIs()	0.974359	0.962025	0.968153	79	0.999797	0.98733	0.912736	0.934783	0.923628	414	0.996104	0.98923	0.98725	0.983666	0.985455	1102	0.998411	0.997558	0.869841	0.901316	0.885299	304	0.995732	0.982285	0.823529	0.388889	0.528302	36	0.999696	0.846661	0.90922	0.995342	0.950334	644	0.993094	0.999056	0.895833	0.895833	0.895833
23	400	rf	knn	5	10000	10	1	1.0	LogAndZeroMeanUnitVar()	AsIs()	1	0.949367	0.974026	79	1	0.980997	0.923885	0.850242	0.885535	414	0.996946	0.970744	0.984726	0.994555	0.989616	1102	0.99807	0.997985	0.875817	0.881579	0.878689	304	0.996045	0.970496	0.71875	0.638889	0.676471	36	0.999089	0.916049	0.97561	0.993789	0.984615	644	0.998273	0.99914	0.93617	0.916667	0.926316
14	100	rf	svm	2000	10000	10	1	1.0	LogAndZeroMeanUnitVar()	AsIs()	0.961039	0.936709	0.948718	79	0.999695	0.999378	0.914005	0.898551	0.906212	414	0.996315	0.996542	0.995455	0.993648	0.99455	1102	0.999432	0.999699	0.901099	0.809211	0.852686	304	0.99719	0.989359	0.740741	0.555556	0.634921	36	0.999291	0.991904	0.979907	0.984472	0.982184	644	0.998597	0.999766	0.956522	0.916667	0.93617
11	100	rf	logistic	2000	10000	10	1	1.0	LogAndZeroMeanUnitVar()	AsIs()	0.934211	0.898734	0.916129	79	0.999491	0.999553	0.919315	0.908213	0.91373	414	0.996525	0.997086	0.995455	0.993648	0.99455	1102	0.999432	0.999857	0.845395	0.845395	0.845395	304	0.995108	0.991064	0.689655	0.555556	0.615385	36	0.999089	0.981437	0.98151	0.98913	0.985305	644	0.998705	0.99984	0.933333	0.875	0.903226
44	10	logistic	rf	2000	10000	10	1	1.0	AsIs()	AsIs()	0.987013	0.962025	0.974359	79	0.999898	0.999167	0.899743	0.845411	0.871731	414	0.995893	0.993896	0.973262	0.990926	0.982014	1102	0.996594	0.998985	0.92	0.832237	0.873921	304	0.99771	0.990067	0.821429	0.638889	0.71875	36	0.999494	0.947128	0.957831	0.987578	0.972477	644	0.996979	0.999705	0.921569	0.979167	0.949495
73	400	random_selection	logistic	2000	10000	10	1	1.0	LogAndZeroMeanUnitVar()	AsIs()	0.948718	0.936709	0.942675	79	0.999593	0.999235	0.893035	0.86715	0.879902	414	0.995472	0.997066	0.982821	0.986388	0.984601	1102	0.997843	0.99907	0.844937	0.878289	0.86129	304	0.9949	0.991429	0.694444	0.694444	0.694444	36	0.998886	0.985148	0.969325	0.981366	0.975309	644	0.997842	0.999598	0.903846	0.979167	0.94
4	19531	all	logistic	2000	10000	10	1	1.0	AsIs()	AsIs()	0.959459	0.898734	0.928105	79	0.999695	0.992391	0.873449	0.850242	0.861689	414	0.99463	0.989238	0.985415	0.980944	0.983174	1102	0.998184	0.996972	0.87372	0.842105	0.857621	304	0.996149	0.989051	0.65625	0.583333	0.617647	36	0.998886	0.981592	0.982893	0.981366	0.982129	644	0.998813	0.999633	0.9	0.9375	0.918367
88	800	random_selection	rf	2000	10000	10	1	1.0	LogAndZeroMeanUnitVar()	AsIs()	0.974026	0.949367	0.961538	79	0.999797	0.999456	0.924479	0.857488	0.889724	414	0.996946	0.994944	0.962181	0.99274	0.977222	1102	0.995119	0.999154	0.89781	0.809211	0.851211	304	0.997085	0.9853	0.666667	0.388889	0.491228	36	0.999291	0.960443	0.966616	0.98913	0.977744	644	0.997626	0.999575	0.90566	1	0.950495
37	5	logistic	knn	5	10000	10	1	1.0	LogAndZeroMeanUnitVar()	AsIs()	0.962025	0.962025	0.962025	79	0.999695	0.993653	0.890819	0.86715	0.878825	414	0.995367	0.980453	0.971275	0.981851	0.976534	1102	0.996367	0.995225	0.829653	0.865132	0.847021	304	0.994379	0.979383	0.777778	0.388889	0.518519	36	0.999595	0.846457	0.904225	0.996894	0.948301	644	0.992662	0.999292	0.916667	0.916667	0.916667
93	400	random_selection	svm	2000	10000	10	1	1.0	LogAndZeroMeanUnitVar()	AsIs()	0.986842	0.949367	0.967742	79	0.999898	0.996995	0.866499	0.830918	0.848335	414	0.994419	0.995801	0.980054	0.980944	0.980499	1102	0.997503	0.999703	0.826797	0.832237	0.829508	304	0.994483	0.990459	0.71875	0.638889	0.676471	36	0.999089	0.98137	0.973684	0.976708	0.975194	644	0.998166	0.999712	0.959184	0.979167	0.969072
124	800	random_selection	rf	2000	10000	10	1	1.0	AsIs()	AsIs()	0.974026	0.949367	0.961538	79	0.999797	0.99715	0.908136	0.835749	0.87044	414	0.996315	0.991267	0.969778	0.990018	0.979793	1102	0.99614	0.998534	0.856643	0.805921	0.830508	304	0.995732	0.985013	0.826087	0.527778	0.644068	36	0.999595	0.960048	0.962064	0.984472	0.973139	644	0.997302	0.999539	0.90566	1	0.950495
34	5	logistic	rf	2000	10000	10	1	1.0	AsIs()	AsIs()	0.974359	0.962025	0.968153	79	0.999797	0.997285	0.880637	0.801932	0.839444	414	0.995262	0.990442	0.967169	0.989111	0.978017	1102	0.9958	0.999061	0.879121	0.789474	0.831889	304	0.996565	0.987507	0.807692	0.583333	0.677419	36	0.999494	0.965885	0.960666	0.986025	0.97318	644	0.997194	0.999648	0.959184	0.979167	0.969072
118	80	logistic	logistic	2000	10000	10	1	1.0	AsIs()	AsIs()	0.946667	0.898734	0.922078	79	0.999593	0.989402	0.8625	0.833333	0.847666	414	0.994209	0.987944	0.986264	0.977314	0.981768	1102	0.998297	0.99758	0.823529	0.828947	0.82623	304	0.994379	0.986498	0.705882	0.666667	0.685714	36	0.998987	0.990473	0.987441	0.976708	0.982045	644	0.999137	0.999603	0.867925	0.958333	0.910891
67	400	random_selection	rf	2000	10000	10	1	1.0	LogAndZeroMeanUnitVar()	AsIs()	0.986667	0.936709	0.961039	79	0.999898	0.991259	0.917553	0.833333	0.873418	414	0.996736	0.991867	0.968889	0.989111	0.978895	1102	0.996027	0.999391	0.879121	0.789474	0.831889	304	0.996565	0.989069	0.73913	0.472222	0.576271	36	0.999392	0.928927	0.954545	0.978261	0.966258	644	0.996763	0.999495	0.941176	1	0.969697
72	200	random_selection	logistic	2000	10000	10	1	1.0	LogAndZeroMeanUnitVar()	AsIs()	0.925926	0.949367	0.9375	79	0.99939	0.997218	0.882793	0.855072	0.868712	414	0.995051	0.994417	0.980978	0.982759	0.981868	1102	0.997616	0.999293	0.836066	0.838816	0.837438	304	0.994795	0.992844	0.571429	0.555556	0.56338	36	0.998481	0.987013	0.959877	0.965839	0.962848	644	0.997194	0.999459	0.93617	0.916667	0.926316
114	40	logistic	logistic	2000	10000	10	1	1.0	AsIs()	AsIs()	0.946667	0.898734	0.922078	79	0.999593	0.993177	0.85258	0.838164	0.845311	414	0.993682	0.986317	0.981785	0.978221	0.98	1102	0.99773	0.99628	0.826087	0.8125	0.819237	304	0.994587	0.98784	0.714286	0.694444	0.704225	36	0.998987	0.98562	0.985915	0.978261	0.982073	644	0.999029	0.999586	0.886792	0.979167	0.930693
109	20	logistic	logistic	2000	10000	10	1	1.0	AsIs()	AsIs()	0.959459	0.898734	0.928105	79	0.999695	0.996996	0.861042	0.838164	0.849449	414	0.994103	0.987944	0.971067	0.974592	0.972826	1102	0.996367	0.997125	0.828859	0.8125	0.820598	304	0.994691	0.990523	0.75	0.666667	0.705882	36	0.99919	0.978661	0.978362	0.982919	0.980635	644	0.998489	0.99942	0.884615	0.958333	0.92
31	50	rf	rf	2000	10000	10	1	1.0	AsIs()	AsIs()	0.971831	0.873418	0.92	79	0.999797	0.996994	0.863962	0.874396	0.869148	414	0.993998	0.993421	0.99095	0.993648	0.992297	1102	0.998865	0.999789	0.84	0.759868	0.797927	304	0.99542	0.987918	0.736842	0.388889	0.509091	36	0.999494	0.964736	0.967742	0.978261	0.972973	644	0.997734	0.999514	0.913043	0.875	0.893617
17	200	rf	knn	5	10000	10	1	1.0	LogAndZeroMeanUnitVar()	AsIs()	0.986486	0.924051	0.954248	79	0.999898	0.98728	0.905292	0.785024	0.84088	414	0.99642	0.946507	0.971656	0.995463	0.983416	1102	0.996367	0.997969	0.810169	0.786184	0.797997	304	0.994171	0.957398	0.689655	0.555556	0.615385	36	0.999089	0.901654	0.965257	0.992236	0.97856	644	0.997518	0.997956	0.886364	0.8125	0.847826
6	50	rf	rf	2000	10000	10	1	1.0	LogAndZeroMeanUnitVar()	AsIs()	0.959459	0.898734	0.928105	79	0.999695	0.998951	0.894737	0.903382	0.899038	414	0.995367	0.993217	0.987365	0.99274	0.990045	1102	0.998411	0.99956	0.85	0.782895	0.815068	304	0.995628	0.986314	0.666667	0.388889	0.491228	36	0.999291	0.965931	0.961656	0.973602	0.967593	644	0.997302	0.999602	0.886364	0.8125	0.847826
106	400	random_selection	rf	2000	10000	10	1	1.0	AsIs()	AsIs()	0.949367	0.949367	0.949367	79	0.999593	0.996882	0.87766	0.797101	0.835443	414	0.995156	0.990313	0.961096	0.986388	0.973578	1102	0.995005	0.998044	0.867159	0.773026	0.817391	304	0.996253	0.982432	0.68	0.472222	0.557377	36	0.99919	0.96128	0.956391	0.987578	0.971734	644	0.996871	0.999405	0.923077	1	0.96
104	10	logistic	logistic	2000	10000	10	1	1.0	AsIs()	AsIs()	0.934211	0.898734	0.916129	79	0.999491	0.998512	0.830467	0.816425	0.823386	414	0.992735	0.985971	0.966576	0.970962	0.968764	1102	0.9958	0.997509	0.819113	0.789474	0.80402	304	0.994483	0.990301	0.764706	0.722222	0.742857	36	0.99919	0.973207	0.972265	0.979814	0.976025	644	0.998058	0.999401	0.901961	0.958333	0.929293
79	200	random_selection	rf	2000	10000	10	1	1.0	LogAndZeroMeanUnitVar()	AsIs()	0.973684	0.936709	0.954839	79	0.999797	0.996698	0.917355	0.804348	0.857143	414	0.996841	0.988347	0.934539	0.984574	0.958904	1102	0.991372	0.998569	0.897233	0.746711	0.815081	304	0.997294	0.984875	0.733333	0.305556	0.431373	36	0.999595	0.93461	0.949102	0.984472	0.966463	644	0.996331	0.999426	0.90566	1	0.950495
108	200	random_selection	rf	2000	10000	10	1	1.0	AsIs()	AsIs()	0.986667	0.936709	0.961039	79	0.999898	0.99885	0.875	0.828502	0.851117	414	0.99484	0.991355	0.944348	0.985481	0.964476	1102	0.992735	0.998668	0.852273	0.740132	0.792254	304	0.99594	0.983575	0.72	0.5	0.590164	36	0.999291	0.972224	0.950226	0.978261	0.96404	644	0.996439	0.999142	0.959184	0.979167	0.969072
7	50	rf	logistic	2000	10000	10	1	1.0	LogAndZeroMeanUnitVar()	AsIs()	0.868421	0.835443	0.851613	79	0.998983	0.995951	0.881928	0.884058	0.882992	414	0.99484	0.993738	0.991833	0.991833	0.991833	1102	0.998978	0.99988	0.856643	0.805921	0.830508	304	0.995732	0.985735	0.565217	0.361111	0.440678	36	0.998987	0.987966	0.958589	0.970497	0.964506	644	0.997086	0.999636	0.854167	0.854167	0.854167
59	800	rf	logistic	2000	10000	10	1	1.0	AsIs()	AsIs()	0.879518	0.924051	0.901235	79	0.998983	0.998836	0.834951	0.830918	0.83293	414	0.99284	0.990389	0.983547	0.976407	0.979964	1102	0.997957	0.997634	0.787456	0.743421	0.764805	304	0.99365	0.985977	0.575758	0.527778	0.550725	36	0.998582	0.973195	0.962733	0.962733	0.962733	644	0.99741	0.998703	0.796296	0.895833	0.843137
96	5	logistic	logistic	2000	10000	10	1	1.0	AsIs()	AsIs()	0.934211	0.898734	0.916129	79	0.999491	0.990652	0.829949	0.789855	0.809406	414	0.992945	0.984648	0.964674	0.966425	0.965549	1102	0.995573	0.996432	0.779221	0.789474	0.784314	304	0.992922	0.988147	0.71875	0.638889	0.676471	36	0.999089	0.96757	0.958009	0.956522	0.957265	644	0.997086	0.998827	0.888889	1	0.941176
125	800	random_selection	logistic	2000	10000	10	1	1.0	AsIs()	AsIs()	0.934211	0.898734	0.916129	79	0.999491	0.985036	0.858247	0.804348	0.830424	414	0.994209	0.987842	0.972603	0.966425	0.969504	1102	0.996594	0.996196	0.767742	0.782895	0.775244	304	0.992505	0.989532	0.827586	0.666667	0.738462	36	0.999494	0.959409	0.96302	0.970497	0.966744	644	0.99741	0.99777	0.93617	0.916667	0.926316
38	19531	all	svm	2000	10000	10	1	1.0	AsIs()	AsIs()	0.961039	0.936709	0.948718	79	0.999695	0.992467	0.86612	0.7657	0.812821	414	0.99484	0.987429	0.966576	0.970962	0.968764	1102	0.9958	0.998243	0.745704	0.713816	0.729412	304	0.992297	0.985042	0.758621	0.611111	0.676923	36	0.999291	0.989598	0.975309	0.981366	0.978328	644	0.998273	0.999323	0.811321	0.895833	0.851485
68	800	random_selection	knn	5	10000	10	1	1.0	LogAndZeroMeanUnitVar()	AsIs()	0.986667	0.936709	0.961039	79	0.999898	0.980996	0.87234	0.792271	0.83038	414	0.994946	0.951766	0.913663	0.989111	0.949891	1102	0.988307	0.996793	0.794953	0.828947	0.811594	304	0.993234	0.965158	0.8	0.666667	0.727273	36	0.999392	0.915866	0.872777	0.990683	0.928	644	0.989964	0.99729	0.884615	0.958333	0.92
120	80	logistic	svm	2000	10000	10	1	1.0	AsIs()	AsIs()	0.960526	0.924051	0.941935	79	0.999695	0.99256	0.854396	0.751208	0.799486	414	0.994419	0.985207	0.959423	0.965517	0.96246	1102	0.994892	0.998081	0.729452	0.700658	0.714765	304	0.991777	0.983521	0.758621	0.611111	0.676923	36	0.999291	0.990357	0.975232	0.978261	0.976744	644	0.998273	0.999082	0.792453	0.875	0.831683
116	40	logistic	svm	2000	10000	10	1	1.0	AsIs()	AsIs()	0.960526	0.924051	0.941935	79	0.999695	0.992573	0.854795	0.753623	0.801027	414	0.994419	0.984426	0.954137	0.962795	0.958446	1102	0.99421	0.997934	0.714765	0.700658	0.707641	304	0.991152	0.983136	0.758621	0.611111	0.676923	36	0.999291	0.990698	0.973479	0.968944	0.971206	644	0.998166	0.999023	0.811321	0.895833	0.851485
66	100	random_selection	logistic	2000	10000	10	1	1.0	LogAndZeroMeanUnitVar()	AsIs()	0.935065	0.911392	0.923077	79	0.999491	0.993837	0.838235	0.826087	0.832117	414	0.99305	0.990293	0.938108	0.962795	0.950291	1102	0.992054	0.995938	0.766892	0.746711	0.756667	304	0.992818	0.98676	0.571429	0.444444	0.5	36	0.998785	0.960771	0.955521	0.967391	0.96142	644	0.996871	0.999408	0.952381	0.833333	0.888889
92	200	random_selection	svm	2000	10000	10	1	1.0	LogAndZeroMeanUnitVar()	AsIs()	0.973333	0.924051	0.948052	79	0.999797	0.996372	0.811736	0.801932	0.806804	414	0.991892	0.989972	0.966486	0.96824	0.967362	1102	0.9958	0.999207	0.813433	0.717105	0.762238	304	0.994795	0.987002	0.758621	0.611111	0.676923	36	0.999291	0.986385	0.959565	0.958075	0.958819	644	0.997194	0.999216	0.914894	0.895833	0.905263
9	50	rf	svm	2000	10000	10	1	1.0	LogAndZeroMeanUnitVar()	AsIs()	0.851351	0.797468	0.823529	79	0.998881	0.997336	0.888312	0.826087	0.85607	414	0.995472	0.994332	0.983827	0.993648	0.988713	1102	0.997957	0.99982	0.783051	0.759868	0.771285	304	0.993338	0.982339	0.625	0.416667	0.5	36	0.999089	0.98802	0.964286	0.964286	0.964286	644	0.997518	0.999393	0.909091	0.833333	0.869565
111	20	logistic	svm	2000	10000	10	1	1.0	AsIs()	AsIs()	0.947368	0.911392	0.929032	79	0.999593	0.993137	0.842541	0.736715	0.786082	414	0.993998	0.982402	0.945487	0.960073	0.952724	1102	0.993075	0.997703	0.715302	0.661184	0.687179	304	0.991673	0.982365	0.766667	0.638889	0.69697	36	0.999291	0.988439	0.971919	0.967391	0.96965	644	0.998058	0.998801	0.796296	0.895833	0.843137
122	400	random_selection	logistic	2000	10000	10	1	1.0	AsIs()	AsIs()	0.945946	0.886076	0.915033	79	0.999593	0.984599	0.81701	0.7657	0.790524	414	0.992524	0.980498	0.949776	0.96098	0.955345	1102	0.993643	0.997818	0.74026	0.75	0.745098	304	0.991673	0.98173	0.842105	0.444444	0.581818	36	0.999696	0.947803	0.962963	0.968944	0.965944	644	0.99741	0.997849	0.891304	0.854167	0.87234
57	100	random_selection	rf	2000	10000	10	1	1.0	AsIs()	AsIs()	0.986301	0.911392	0.947368	79	0.999898	0.996792	0.855228	0.770531	0.810673	414	0.994314	0.985625	0.898079	0.975499	0.935189	1102	0.986151	0.99678	0.811475	0.651316	0.722628	304	0.995212	0.978208	0.875	0.194444	0.318182	36	0.999899	0.941072	0.945701	0.973602	0.959449	644	0.996115	0.998359	0.884615	0.958333	0.92
64	100	random_selection	rf	2000	10000	10	1	1.0	LogAndZeroMeanUnitVar()	AsIs()	0.986111	0.898734	0.940397	79	0.999898	0.990016	0.820106	0.748792	0.782828	414	0.99284	0.9845	0.896234	0.971869	0.932521	1102	0.985923	0.995985	0.821429	0.680921	0.744604	304	0.995316	0.975805	1	0.25	0.4	36	1	0.964252	0.923417	0.973602	0.947846	644	0.994389	0.99806	0.923077	1	0.96
53	400	rf	logistic	2000	10000	10	1	1.0	AsIs()	AsIs()	0.9	0.911392	0.90566	79	0.999186	0.995812	0.821516	0.811594	0.816525	414	0.992313	0.98777	0.979204	0.982759	0.980978	1102	0.997389	0.998232	0.691083	0.713816	0.702265	304	0.989903	0.981167	0.685714	0.666667	0.676056	36	0.998886	0.966776	0.953488	0.954969	0.954228	644	0.996763	0.997697	0.794872	0.645833	0.712644
105	10	logistic	svm	2000	10000	10	1	1.0	AsIs()	AsIs()	0.947368	0.911392	0.929032	79	0.999593	0.993443	0.834711	0.731884	0.779923	414	0.993682	0.979301	0.931278	0.959165	0.945016	1102	0.991145	0.997641	0.691275	0.677632	0.684385	304	0.990424	0.982164	0.740741	0.555556	0.634921	36	0.999291	0.980985	0.968799	0.964286	0.966537	644	0.997842	0.99831	0.792453	0.875	0.831683
98	5	logistic	svm	2000	10000	10	1	1.0	AsIs()	AsIs()	0.946667	0.898734	0.922078	79	0.999593	0.991075	0.789757	0.707729	0.746497	414	0.991787	0.976202	0.937332	0.950091	0.943668	1102	0.992054	0.995946	0.635088	0.595395	0.614601	304	0.989175	0.97816	0.724138	0.583333	0.646154	36	0.99919	0.963488	0.96395	0.954969	0.959438	644	0.997518	0.997841	0.792453	0.875	0.831683
13	100	rf	knn	5	10000	10	1	1.0	LogAndZeroMeanUnitVar()	AsIs()	0.883117	0.860759	0.871795	79	0.999085	0.980542	0.756281	0.727053	0.741379	414	0.989786	0.93751	0.954585	0.991833	0.972853	1102	0.994097	0.997751	0.663121	0.615132	0.638225	304	0.990111	0.921111	0.695652	0.444444	0.542373	36	0.999291	0.900949	0.930678	0.979814	0.954614	644	0.994928	0.99695	0.837838	0.645833	0.729412
61	800	rf	svm	2000	10000	10	1	1.0	AsIs()	AsIs()	0.924051	0.924051	0.924051	79	0.99939	0.997286	0.770235	0.71256	0.740276	414	0.990734	0.976528	0.951743	0.966425	0.959027	1102	0.99387	0.996496	0.679487	0.523026	0.591078	304	0.992193	0.969766	0.777778	0.583333	0.666667	36	0.999392	0.961021	0.915556	0.959627	0.937074	644	0.993849	0.998388	0.557143	0.8125	0.661017
63	50	random_selection	rf	2000	10000	10	1	1.0	LogAndZeroMeanUnitVar()	AsIs()	0.955882	0.822785	0.884354	79	0.999695	0.989954	0.766017	0.664251	0.711514	414	0.991155	0.970963	0.83899	0.96461	0.897425	1102	0.976842	0.993155	0.791667	0.625	0.698529	304	0.994795	0.973406	1	0.0833333	0.153846	36	1	0.936987	0.893064	0.959627	0.92515	644	0.992015	0.997369	0.9375	0.9375	0.9375
100	200	random_selection	logistic	2000	10000	10	1	1.0	AsIs()	AsIs()	0.853659	0.886076	0.869565	79	0.998779	0.982546	0.762626	0.729469	0.745679	414	0.990102	0.969714	0.914235	0.938294	0.926108	1102	0.988989	0.993072	0.686411	0.648026	0.666667	304	0.990632	0.969956	0.714286	0.416667	0.526316	36	0.999392	0.945333	0.922018	0.936335	0.929122	644	0.994497	0.997739	0.869565	0.833333	0.851064
47	200	rf	logistic	2000	10000	10	1	1.0	AsIs()	AsIs()	0.878378	0.822785	0.849673	79	0.999085	0.993081	0.821244	0.7657	0.7925	414	0.992735	0.982843	0.976342	0.973684	0.975011	1102	0.997048	0.997646	0.637681	0.578947	0.606897	304	0.989591	0.967209	0.652174	0.416667	0.508475	36	0.99919	0.956549	0.928135	0.942547	0.935285	644	0.994928	0.99633	0.875	0.145833	0.25
71	50	random_selection	logistic	2000	10000	10	1	1.0	LogAndZeroMeanUnitVar()	AsIs()	0.915493	0.822785	0.866667	79	0.99939	0.987731	0.7525	0.727053	0.739558	414	0.989576	0.973463	0.893136	0.932849	0.912561	1102	0.986037	0.99382	0.692042	0.657895	0.674536	304	0.990736	0.97909	0.642857	0.25	0.36	36	0.999494	0.954447	0.898356	0.93323	0.915461	644	0.992662	0.996683	0.846154	0.916667	0.88
80	100	random_selection	svm	2000	10000	10	1	1.0	LogAndZeroMeanUnitVar()	AsIs()	0.921053	0.886076	0.903226	79	0.99939	0.991024	0.731959	0.68599	0.708229	414	0.989049	0.976088	0.918149	0.936479	0.927224	1102	0.989556	0.99579	0.698925	0.641447	0.668954	304	0.991256	0.977016	0.608696	0.388889	0.474576	36	0.999089	0.970588	0.922256	0.939441	0.930769	644	0.994497	0.998363	0.833333	0.833333	0.833333
3	19531	all	knn	5	10000	10	1	1.0	AsIs()	AsIs()	0.911392	0.911392	0.911392	79	0.999288	0.961911	0.736	0.666667	0.69962	414	0.989576	0.902714	0.864086	0.951906	0.905872	1102	0.981269	0.985342	0.633452	0.585526	0.608547	304	0.989279	0.887635	0.571429	0.444444	0.5	36	0.998785	0.85939	0.811443	0.968944	0.883227	644	0.984353	0.995544	0.784314	0.833333	0.808081
45	50	random_selection	rf	2000	10000	10	1	1.0	AsIs()	AsIs()	0.972603	0.898734	0.934211	79	0.999797	0.989081	0.77591	0.669082	0.718547	414	0.991576	0.963255	0.81875	0.950998	0.879933	1102	0.973663	0.991591	0.686695	0.526316	0.595903	304	0.992401	0.972944	0.833333	0.138889	0.238095	36	0.999899	0.934972	0.863188	0.950311	0.904656	644	0.989533	0.996641	0.956522	0.916667	0.93617
81	400	random_selection	knn	5	10000	10	1	1.0	LogAndZeroMeanUnitVar()	AsIs()	0.986111	0.898734	0.940397	79	0.999898	0.968249	0.764205	0.649758	0.70235	414	0.99126	0.914989	0.822717	0.972777	0.891476	1102	0.973777	0.990673	0.649518	0.664474	0.656911	304	0.988654	0.915957	0.681818	0.416667	0.517241	36	0.999291	0.873352	0.837981	0.979814	0.903364	644	0.986835	0.994639	0.97561	0.833333	0.898876
60	800	rf	knn	5	10000	10	1	1.0	AsIs()	AsIs()	0.86747	0.911392	0.888889	79	0.998881	0.968119	0.706468	0.68599	0.696078	414	0.987575	0.902784	0.926638	0.962795	0.94437	1102	0.990464	0.989507	0.549645	0.509868	0.52901	304	0.98678	0.868304	0.709677	0.611111	0.656716	36	0.999089	0.873104	0.851296	0.968944	0.906318	644	0.988238	0.994306	0.528736	0.958333	0.681481
115	40	logistic	knn	5	10000	10	1	1.0	AsIs()	AsIs()	0.924051	0.924051	0.924051	79	0.99939	0.961907	0.71504	0.654589	0.68348	414	0.988628	0.89653	0.835726	0.950998	0.889643	1102	0.976615	0.983419	0.619217	0.572368	0.594872	304	0.988862	0.877194	0.555556	0.416667	0.47619	36	0.998785	0.817977	0.810636	0.970497	0.883392	644	0.984245	0.993062	0.82	0.854167	0.836735
119	80	logistic	knn	5	10000	10	1	1.0	AsIs()	AsIs()	0.923077	0.911392	0.917197	79	0.99939	0.961906	0.723684	0.664251	0.692695	414	0.988944	0.89372	0.841385	0.948276	0.891638	1102	0.977637	0.983666	0.6121	0.565789	0.588034	304	0.988654	0.880183	0.551724	0.444444	0.492308	36	0.998684	0.831781	0.802835	0.967391	0.877465	644	0.98349	0.993733	0.769231	0.833333	0.8
55	400	rf	svm	2000	10000	10	1	1.0	AsIs()	AsIs()	0.907895	0.873418	0.890323	79	0.999288	0.989085	0.721271	0.71256	0.716889	414	0.987996	0.976946	0.961574	0.953721	0.957631	1102	0.995232	0.995954	0.607477	0.427632	0.501931	304	0.991256	0.960847	0.517241	0.416667	0.461538	36	0.998582	0.968956	0.888889	0.944099	0.915663	644	0.991799	0.997108	0.435484	0.5625	0.490909
127	800	random_selection	svm	2000	10000	10	1	1.0	AsIs()	AsIs()	0.921053	0.886076	0.903226	79	0.99939	0.983203	0.753463	0.657005	0.701935	414	0.990629	0.970708	0.906082	0.919238	0.912613	1102	0.98808	0.993334	0.564394	0.490132	0.524648	304	0.98803	0.961332	0.782609	0.5	0.610169	36	0.999494	0.947767	0.907324	0.942547	0.9246	644	0.99331	0.995696	0.784314	0.833333	0.808081
113	100	random_selection	logistic	2000	10000	10	1	1.0	AsIs()	AsIs()	0.882353	0.759494	0.816327	79	0.999186	0.983494	0.736986	0.649758	0.690629	414	0.989892	0.965898	0.903724	0.902904	0.903314	1102	0.987967	0.986751	0.608392	0.572368	0.589831	304	0.988342	0.969825	0.608696	0.388889	0.474576	36	0.999089	0.923339	0.912577	0.923913	0.91821	644	0.993849	0.995628	0.857143	0.875	0.865979
110	20	logistic	knn	5	10000	10	1	1.0	AsIs()	AsIs()	0.947368	0.911392	0.929032	79	0.999593	0.961891	0.673418	0.642512	0.657602	414	0.986417	0.894802	0.81768	0.940109	0.874631	1102	0.973777	0.983373	0.595819	0.5625	0.57868	304	0.987925	0.876609	0.545455	0.333333	0.413793	36	0.998987	0.803983	0.796675	0.967391	0.873773	644	0.982842	0.995364	0.788462	0.854167	0.82
123	400	random_selection	svm	2000	10000	10	1	1.0	AsIs()	AsIs()	0.869048	0.924051	0.895706	79	0.998881	0.979845	0.712737	0.635266	0.671775	414	0.988839	0.962236	0.904847	0.914701	0.909747	1102	0.987967	0.99015	0.598291	0.460526	0.520446	304	0.990215	0.958958	0.75	0.333333	0.461538	36	0.999595	0.966914	0.895865	0.908385	0.902082	644	0.992662	0.994622	0.833333	0.833333	0.833333
97	5	logistic	knn	5	10000	10	1	1.0	AsIs()	AsIs()	0.890411	0.822785	0.855263	79	0.999186	0.949044	0.60262	0.666667	0.633028	414	0.980836	0.901756	0.840099	0.920145	0.878302	1102	0.978091	0.976418	0.524	0.430921	0.472924	304	0.987613	0.862588	0.619048	0.361111	0.45614	36	0.99919	0.77628	0.837618	0.96118	0.895155	644	0.987051	0.987983	0.72549	0.770833	0.747475
41	100	rf	logistic	2000	10000	10	1	1.0	AsIs()	AsIs()	0.849057	0.56962	0.681818	79	0.999186	0.990829	0.745327	0.770531	0.75772	414	0.988523	0.9778	0.954707	0.975499	0.964991	1102	0.99421	0.997698	0.545775	0.509868	0.527211	304	0.986572	0.945865	0.421053	0.222222	0.290909	36	0.998886	0.95964	0.927245	0.930124	0.928682	644	0.994928	0.996764	0.5	0.104167	0.172414
103	10	logistic	knn	5	10000	10	1	1.0	AsIs()	AsIs()	0.909091	0.886076	0.897436	79	0.999288	0.961857	0.63285	0.63285	0.63285	414	0.983995	0.890818	0.800312	0.931034	0.860738	1102	0.970939	0.98106	0.607843	0.509868	0.554562	304	0.989591	0.875777	0.555556	0.277778	0.37037	36	0.99919	0.77638	0.793059	0.958075	0.867792	644	0.982627	0.988111	0.8125	0.8125	0.8125
54	400	rf	knn	5	10000	10	1	1.0	AsIs()	AsIs()	0.878049	0.911392	0.89441	79	0.998983	0.974387	0.64977	0.681159	0.665094	414	0.983995	0.898413	0.952209	0.958258	0.955224	1102	0.993983	0.984694	0.454874	0.414474	0.433735	304	0.984282	0.841416	0.580645	0.5	0.537313	36	0.998684	0.85921	0.835801	0.964286	0.895458	644	0.986835	0.989108	0.453608	0.916667	0.606897
48	200	rf	knn	5	10000	10	1	1.0	AsIs()	AsIs()	0.7875	0.797468	0.792453	79	0.998271	0.929451	0.637813	0.676329	0.656506	414	0.983258	0.901939	0.944995	0.950998	0.947987	1102	0.993075	0.986237	0.384365	0.388158	0.386252	304	0.980327	0.827963	0.535714	0.416667	0.46875	36	0.998684	0.775363	0.864865	0.944099	0.902747	644	0.989749	0.988153	0.554054	0.854167	0.672131
78	50	random_selection	svm	2000	10000	10	1	1.0	LogAndZeroMeanUnitVar()	AsIs()	0.846154	0.696203	0.763889	79	0.998983	0.983218	0.676316	0.620773	0.647355	414	0.987049	0.960204	0.863278	0.893829	0.878288	1102	0.982291	0.989981	0.609319	0.559211	0.58319	304	0.988654	0.961755	0.578947	0.305556	0.4	36	0.99919	0.952903	0.904908	0.916149	0.910494	644	0.99331	0.995522	0.863636	0.791667	0.826087
49	200	rf	svm	2000	10000	10	1	1.0	AsIs()	AsIs()	0.782051	0.772152	0.77707	79	0.998271	0.992556	0.678133	0.666667	0.672351	414	0.986206	0.96354	0.958716	0.948276	0.953467	1102	0.994892	0.995716	0.496552	0.236842	0.320713	304	0.992401	0.939054	0.695652	0.444444	0.542373	36	0.999291	0.964141	0.844729	0.920807	0.881129	644	0.988238	0.995217	0.478261	0.458333	0.468085
42	100	rf	knn	5	10000	10	1	1.0	AsIs()	AsIs()	0.73494	0.772152	0.753086	79	0.997762	0.941606	0.654018	0.707729	0.679814	414	0.983679	0.909666	0.961679	0.956443	0.959054	1102	0.995232	0.985713	0.387218	0.338816	0.361404	304	0.983033	0.813655	0.44	0.305556	0.360656	36	0.998582	0.788364	0.873913	0.936335	0.904048	644	0.990612	0.980562	0.584615	0.791667	0.672566
8	50	rf	knn	5	10000	10	1	1.0	LogAndZeroMeanUnitVar()	AsIs()	0.644737	0.620253	0.632258	79	0.997254	0.889638	0.548583	0.654589	0.596916	414	0.976519	0.896019	0.936411	0.975499	0.955556	1102	0.991713	0.994847	0.459649	0.430921	0.444822	304	0.98397	0.847699	0.380952	0.222222	0.280702	36	0.998684	0.760767	0.876923	0.973602	0.922737	644	0.990504	0.993417	0.76	0.395833	0.520548
33	50	rf	knn	5	10000	10	1	1.0	AsIs()	AsIs()	0.686047	0.746835	0.715152	79	0.997254	0.935359	0.604743	0.73913	0.665217	414	0.978941	0.918955	0.968548	0.950091	0.95923	1102	0.99614	0.985829	0.444816	0.4375	0.441128	304	0.982721	0.849274	0.392857	0.305556	0.34375	36	0.998278	0.74688	0.872059	0.920807	0.89577	644	0.990612	0.98061	0.633333	0.791667	0.703704
102	200	random_selection	svm	2000	10000	10	1	1.0	AsIs()	AsIs()	0.9375	0.759494	0.839161	79	0.999593	0.979286	0.691643	0.57971	0.630749	414	0.988733	0.946359	0.851787	0.88657	0.868831	1102	0.980702	0.985229	0.59204	0.391447	0.471287	304	0.991465	0.944601	0.692308	0.25	0.367347	36	0.999595	0.943561	0.831897	0.899068	0.864179	644	0.987375	0.992409	0.673913	0.645833	0.659574
94	50	random_selection	logistic	2000	10000	10	1	1.0	AsIs()	AsIs()	0.80303	0.670886	0.731034	79	0.998678	0.967062	0.643432	0.57971	0.609911	414	0.985996	0.94512	0.806809	0.860254	0.832675	1102	0.974231	0.97548	0.596708	0.476974	0.530165	304	0.989799	0.947367	0.611111	0.305556	0.407407	36	0.999291	0.884956	0.848665	0.888199	0.867982	644	0.988993	0.988294	0.818182	0.75	0.782609
32	50	rf	logistic	2000	10000	10	1	1.0	AsIs()	AsIs()	0.88	0.278481	0.423077	79	0.999695	0.971131	0.665169	0.714976	0.689173	414	0.984311	0.964702	0.924935	0.972777	0.948253	1102	0.990124	0.996397	0.354037	0.375	0.364217	304	0.978349	0.920997	1	0.0277778	0.0540541	36	1	0.901409	0.915493	0.908385	0.911925	644	0.994173	0.995387	0	0	0
126	800	random_selection	knn	5	10000	10	1	1.0	AsIs()	AsIs()	0.920635	0.734177	0.816901	79	0.999491	0.917221	0.546729	0.565217	0.555819	414	0.979572	0.856256	0.77706	0.872958	0.822222	1102	0.968668	0.962257	0.477273	0.414474	0.443662	304	0.985635	0.835786	0.55	0.305556	0.392857	36	0.999089	0.802878	0.737164	0.936335	0.824897	644	0.976799	0.982688	0.869565	0.833333	0.851064
43	100	rf	svm	2000	10000	10	1	1.0	AsIs()	AsIs()	0.642857	0.455696	0.533333	79	0.997966	0.97615	0.72	0.652174	0.684411	414	0.988944	0.959307	0.940576	0.919238	0.929784	1102	0.992735	0.994495	0.344156	0.174342	0.231441	304	0.989487	0.916334	0.625	0.277778	0.384615	36	0.999392	0.9531	0.855655	0.892857	0.87386	644	0.989533	0.994317	0.571429	0.583333	0.57732
99	100	random_selection	svm	2000	10000	10	1	1.0	AsIs()	AsIs()	0.853333	0.810127	0.831169	79	0.998881	0.978274	0.64011	0.562802	0.598972	414	0.986206	0.944498	0.766721	0.852995	0.80756	1102	0.967533	0.980241	0.558594	0.470395	0.510714	304	0.988238	0.948986	0.6	0.416667	0.491803	36	0.998987	0.961457	0.74934	0.881988	0.810271	644	0.979497	0.98873	0.7	0.729167	0.714286
121	400	random_selection	knn	5	10000	10	1	1.0	AsIs()	AsIs()	0.791045	0.670886	0.726027	79	0.998576	0.897872	0.496788	0.560386	0.526674	414	0.975255	0.847835	0.747082	0.871143	0.804357	1102	0.963106	0.957916	0.466165	0.407895	0.435088	304	0.985219	0.833361	0.454545	0.277778	0.344828	36	0.998785	0.774198	0.693208	0.919255	0.790387	644	0.971728	0.975451	0.787234	0.770833	0.778947
87	200	random_selection	knn	5	10000	10	1	1.0	LogAndZeroMeanUnitVar()	AsIs()	0.776316	0.746835	0.76129	79	0.998271	0.954935	0.514673	0.550725	0.532089	414	0.977361	0.847131	0.695622	0.908348	0.787879	1102	0.950278	0.967879	0.471519	0.490132	0.480645	304	0.982617	0.861253	0.277778	0.138889	0.185185	36	0.998684	0.663152	0.741935	0.964286	0.838623	644	0.976691	0.990836	0.75	0.625	0.681818
35	50	rf	svm	2000	10000	10	1	1.0	AsIs()	AsIs()	0.666667	0.278481	0.392857	79	0.998881	0.978359	0.639098	0.615942	0.627306	414	0.984837	0.954863	0.93591	0.901089	0.918169	1102	0.992281	0.990457	0.27907	0.157895	0.201681	304	0.987093	0.905608	0.421053	0.222222	0.290909	36	0.998886	0.943513	0.846617	0.874224	0.860199	644	0.988993	0.993449	0.6	0.4375	0.506024
101	200	random_selection	knn	5	10000	10	1	1.0	AsIs()	AsIs()	0.869565	0.759494	0.810811	79	0.999085	0.936302	0.427907	0.444444	0.436019	414	0.974097	0.789766	0.69361	0.817604	0.750521	1102	0.954819	0.938967	0.433824	0.388158	0.409722	304	0.98397	0.807013	0.555556	0.277778	0.37037	36	0.99919	0.705283	0.695388	0.889752	0.780654	644	0.972915	0.969069	0.782609	0.75	0.765957
95	100	random_selection	knn	5	10000	10	1	1.0	AsIs()	AsIs()	0.651515	0.544304	0.593103	79	0.997661	0.877391	0.430131	0.475845	0.451835	414	0.972518	0.824124	0.72425	0.810345	0.764882	1102	0.961403	0.93775	0.409266	0.348684	0.376554	304	0.984074	0.809591	0.227273	0.138889	0.172414	36	0.998278	0.648564	0.71875	0.892857	0.796399	644	0.97572	0.968256	0.688889	0.645833	0.666667
74	50	random_selection	svm	2000	10000	10	1	1.0	AsIs()	AsIs()	0.532468	0.518987	0.525641	79	0.996338	0.967672	0.454082	0.429952	0.441687	414	0.977467	0.890652	0.701205	0.792196	0.743928	1102	0.95777	0.958882	0.429907	0.302632	0.355212	304	0.987301	0.922612	0.642857	0.25	0.36	36	0.999494	0.889595	0.692857	0.753106	0.721726	644	0.976799	0.968267	0.595745	0.583333	0.589474
51	50	random_selection	knn	5	10000	10	1	1.0	AsIs()	AsIs()	0.661538	0.544304	0.597222	79	0.997762	0.827473	0.349802	0.427536	0.384783	414	0.965357	0.810209	0.680064	0.767695	0.721228	1102	0.954819	0.924907	0.326531	0.315789	0.32107	304	0.97939	0.776857	0.190476	0.111111	0.140351	36	0.998278	0.634443	0.618406	0.85559	0.717915	644	0.963311	0.958469	0.744186	0.666667	0.703297
86	100	random_selection	knn	5	10000	10	1	1.0	LogAndZeroMeanUnitVar()	AsIs()	0.610169	0.455696	0.521739	79	0.997661	0.831973	0.345725	0.449275	0.390756	414	0.962936	0.795215	0.496	0.787659	0.608696	1102	0.899875	0.903351	0.377483	0.375	0.376238	304	0.980431	0.806487	0.153846	0.0555556	0.0816327	36	0.998886	0.618854	0.603448	0.815217	0.693527	644	0.962771	0.947373	0.6	0.375	0.461538
85	50	random_selection	knn	5	10000	10	1	1.0	LogAndZeroMeanUnitVar()	AsIs()	0.428571	0.379747	0.402685	79	0.995932	0.773833	0.265734	0.36715	0.308316	414	0.955776	0.752104	0.502687	0.764065	0.60641	1102	0.905438	0.90104	0.282051	0.289474	0.285714	304	0.976684	0.733342	0.291667	0.194444	0.233333	36	0.998278	0.647093	0.586667	0.819876	0.683938	644	0.959858	0.936841	0.461538	0.25	0.324324
[truncated: 170 more columns]
