# Supplementary material for: A cross-cohort computational framework to trace tumor tissue-of-origin based on RNA sequencing
Source: Sci Rep. 2023 Sep 16;13:15356. doi: 10.1038/s41598-023-42465-8 (PMC10505149; doi:10.1038/s41598-023-42465-8)
Supplement: Supplementary file 4 — Supplementary Table 2. [file 41598_2023_42465_MOESM4_ESM.xlsx]

## Sheet: Sheet1
Supplementary Table 2. Genes selected for each cancer of the 32 cancer types.
	ACC	BLCA	BRCA	CESC	CHOL	COADREAD	DLBC	ESCA	GBM	HNSC	KICH	KIRC	KIRP	LAML	LGG	LIHC	LUAD	LUSC	MESO	OV	PAAD	PCPG	PRAD	SARC	SKCM	STAD	TGCT	THCA	THYM	UCEC	UCS	UVM
0	CYP11B1	SPRR1A	SCGB2A2	SERPINB3	APCS	DEFA6	C7orf72	SPRR2A	PMP2	LCE3D	ATP6V1G3	TMEM174	SLC13A1	MS4A3	MMD2	APCS	SFTPA1	SFTPA1	SPANXB2	SCGB1D1	INS	PHOX2B	PRAC1	SCGB2A1	TYR	REG3A	DPPA3	DEFB131	TBATA	SCGB1D4	RPS4Y1	TYR
1	SULT2A1	SPRR3	RPS4Y1	SERPINB4	GC	CLCA1	SAMD7	AC012005.3	GSX1	SPRR2E	GPRC6A	UGT1A9	SLC17A1	FIBIN	PMP2	APOC3	BPIFA1	SPRR2A	PRR9	RPS4Y1	GCG	INS	KLK3	GLOD5	TRIM51	MUC17	DPPA5	SFTA3	DNTT	RPS4Y1	MYL1	CCDC140
2	CYP11B2	IVL	ANKRD30A	SERPINB13	CRP	DEFA5	FOXQ1	SPRR2E	POU3F4	SPRR2B	MCCD1	UGT2A3	UGT2A3	CLDN1	POU3F4	F9	SFTA3	SPRR2E	HSD3B1	AC012005.3	PNLIP	CARTPT	KLK2	CBLC	LCE2A	REG1A	KHDC3L	NKX2-1	PSMB11	C20orf85	ZFY	SPACA1
3	DLK1	CRCT1	PIP	SPRR2E	FGA	REG3A	ZPBP2	SPRR1B	FAM83B	LCE3E	FOXI1	SLC17A1	ACSM2A	KRT19	GSX1	GC	NKX2-1	ADH7	ITLN1	CMC4	REG3A	NEUROD4	PABPC1L2B	CXCL17	KRTAP19-1	GKN1	PRDM14	OTOS	PAX1	SCGB1D1	EIF1AY	GAPDHS
4	MC2R	FAM25A	ADIPOQ	SPRR2A	APOC3	PHGR1	GTSF1L	CRCT1	TFF1	SPRR2G	KLK15	SLC10A2	SLC17A2	TAS2R41	CCL11	CFHR2	SFTPC	SERPINB13	CEACAM5	PHOX2A	CELA3A	DLK1	PAGE4	AGR3	CCDC140	PHGR1	DPPA2	ZCCHC16	GHRH	SCGB2A1	LIN28B	SLC24A5
5	GSTA3	PLA2G2F	EIF1AY	SPRR1B	SERPINA7	APOBEC1	SERPINA9	SPRR3	B3GNT3	SPRR2A	BSND	SLC17A3	TMEM174	OR52H1	OLIG2	APOA2	SCGB3A2	SPRR1B	SCGB2A1	SST	APCS	C18orf42	MMP26	OVOL2	SLC24A5	AC012005.3	TRIM60	SSX1	DEFA6	ALPPL2	MYOD1	SOX1
6	NR5A1	KRTAP4-1	SCGB1D2	SPRR3	FGG	FABP1	AICDA	SPRR2D	MMD2	SPRR4	PSKH2	SLC13A1	SLC22A12	OR13D1	VSTM2B	UGT2B10	SFTPB	SPRR2D	OR4N2	BPIFB3	SYCN	PHOX2A	NPY	GJB1	PAX3	TM4SF5	OTX2	GFRA4	RAG2	SCGB1D2	DDX3Y	ACCSL
7	TMEM125	UGT1A10	TFAP2B	SPRR1A	UGT2A3	ATOH1	SYTL5	SPRR1A	C2orf80	SPRR1B	RTP2	SLC22A12	TINAG	DYTN	OPALIN	CFHR5	GKN2	SPRR1A	CH17-335B8.4	HIST2H2AA4.1	GC	GJD2	POTEH	C2orf54	CPN1	APOBEC1	LUZP4	OR4D10	VPREB1	DDX3Y	KDM5D	HTN1
8	HSD3B2	C10orf99	CALML5	SPRR2D	C8A	GUCA2A	HMHB1	HIST2H2AA4.1	KLK11	SPRR1A	TMEM213	ACSM2A	GLYAT	OR52K2	CACNG7	AFM	FGG	MAGEA4	RBBP8NL	EIF1AY	REG1B	PRLHR	DEFB132	FGFBP1	GAPDHS	TFF2	CRYGD	TOX3	OR2V1	EIF1AY	DLK1	PAX3
9	NR0B1	KRT20	SLC7A13	CALML5	FGB	URAD	TMEM61	CMC4	OLIG2	CRCT1	SIM1	SLC2A2	SLC22A24	GYPB	C2orf80	HAO1	SFTPA2	BPIFA1	SPRR2F	FAM181A	PPY	SYT4	PABPC1L2A	RBBP8NL	ACCSL	PDX1	HDGFL1	SSX5	CCL25	KDM5D	UTY	TRIM51
10	GRHL2	SPRR1B	TFDP3	KRT6C	GUCA2B	CDX2	SPIC	H2BFS	CACNG7	SPRR2D	ADAM2	OR2A4	SLC17A3	RHAG	CST2	F13B	SCGB1A1	SERPINB3	GJB1	KLK5	CLPS	HAND1	MSMB	KLK6	MIA-RAB4B	LIPF	ZFP42	TG	BHLHE23	SCGB2A2	DSCR4	CPN1
11	TMPRSS2	UPK1B	SPINK8	CRCT1	SLC17A4	RETNLB	TCL1B	HIST2H2AA4	FGFBP1	LCE3A	SLC4A1	ACSM2B	ACSM2B	OR2AK2	NEUROD6	SERPINA7	MUC21	SPRR3	MSMB	HIST1H4F	REG1A	RTL1	CHRNA2	CKMT1A	ROPN1	SI	LIN28A	FOXE1	GSTA1	ZFY	PRAC1	ASB11
12	FXYD3	CASP14	UTY	LY6D	APOH	ISX	MYL2	SCGB1D2	MSMB	KRT6C	DNTT	PRODH2	SLC2A2	TMEM14E	NTSR2	FGA	GGTLC1	SPRR2G	CD300LD	SCGB1D2	CELA3B	ST8SIA3	LMAN1L	CEACAM6	ALX1	TFF1	MAGEB1	ADIG	GJB1	TGM7	DSCR8	ASB10
13	RAB25	VGLL1	KDM5D	RPS4Y1	G6PC	REG1B	HIST1H4F	SERPINB3	AC012005.3	FAM25A	CLDN8	SLC17A2	C14orf105	OR2L5	MOG	C8A	SFTA2	SFTPC	NXPH2	H2BFS	KCNK16	NPY	RPS4Y2	AGR2	AGR3	CEACAM18	GIP	PSG1	DEFA4	UTY	USP9Y	TRPM1
14	C2orf54	FAM83C	FOXA2	LGALS7	SLC17A1	KRT20	CXCR5	LCE3D	RASSF6	LCE1F	PSG9	TINAG	AGXT2	GSTA1	FAM83B	SPP2	AGTR2	KRT6A	ATP6V1G3	HIST2H2AA4	CTRB1	MMP7	POTEG	KDF1	MRGPRX4	REG4	DNMT3L	GAL3ST3	TFDP3	FAM181A	PRAC2	LCE2A
15	MMP7	CRH	CLPSL1	PGLYRP3	SLC17A2	MS4A12	KLK7	TMPRSS11B	RIT2	KLK9.1	SERPINB5	SLC22A6	REG3G	URAD	B3GNT3	MBL2	FGA	KRT6C	ITLN2	KLK8	IAPP	C1orf210	TBL1Y	VGLL1	PNLIPRP3	GKN2	LIM2	AZGP1	OR10T2	RP11-903H12.5	PRL	AGR2
16	CEACAM6	SCGB1D2	DEFB132	KRT6A	C8B	LY6G6D	FFAR1	PGLYRP3	SERPINB5	SERPINB13	CDH16	SLC17A4	SLC10A2	S100A14	LRRTM3	SULT2A1	CHIA	PGLYRP3	NPPB	GJA8	TFF2	CHGA	AMELY	CLDN8	TUBB3	SCGB1D2	MAGEB2	ARHGAP36	HES3	GALP	MYOG	ALX1
17	KCNA4	PADI3	ZFY	CH17-335B8.4	TM4SF4	C5orf52	RASSF10	S100A7	VSTM2B	S100A7A	DEFB132	AGXT2	POU3F3	PCP4	AMER2	FGB	CT83	KRTAP19-1	REG3G	XAGE2B	CRP	ESRP1	PRAC2	CEACAM5	TRPM1	CT83	ANHX	SMR3A	CALML3	USP9Y	NLGN4Y	HOXA5
18	FAM19A4	KRT33A	CST9	LCE3D	TM4SF5	SI	SCGB2A1	SPRR2F	GSX2	KPRP	KRTAP5-3	GLYAT	PRODH2	MMP1	BTBD17	APOH	EMX2	SPRR2F	GIP	SCGN	REG3G	CBLC	SERPINB11	KLK11	LCE1A	EPS8L3	LIN28B	HOXD11	KRT33B	ALPP	RTL1	GSTA3
19	CBLC	KRT13	DDX3Y	CASP14	AFM	TM4SF5	RNF223	KRT6C	OPALIN	C1orf68	SYT10	OR2T10	CDH16	PRSS57	RIT2	SLC2A2	C20orf85	SCGB1A1	SLC13A2	DDX3Y	PRSS1	AGR3	KLK4	TMEM125	TFF1	CDX2	TCL1B	MS4A12	FOXG1	WFDC8	AGTR2	TYRP1
20	FOXQ1	LY6D	MUCL1	LCE3E	SLC2A2	AC011513.3	GH1	CRNN	CCL21	SPRR2F	TMEM174	SLC6A18	SLC6A18	MMP12	FEZF2	SLC17A2	SCGB1D2	SCGB3A2	UGT2B7	CRYGC	TTR	NPBWR2	SOX14	ALDH3B2	OR9G1	TRIM40	GJA10	KRT27	OR10R2	WFDC6	CSRP3	CDRT15L2
21	GPRIN2	SERPINB3	REG1A	S100A7	APOA2	PDX1	SOWAHB	SPRR2B	HEPACAM	SPRR3	KRT6B	C14orf105	SLC22A2	RXFP2	SOX1	UGT2B4	SPP2	LCE3D	HMGCS2	GMNC	APOBEC1	GABRG2	FEV	RNF223	MAGEC2	PGC	DCAF4L2	PCSK2	KRT73	EPPIN	CHRND	HOXA3
22	DEFB1	MAGEA9	FOXI1	SLURP1	GUCA2A	C10orf99	KLK6	IL36A	RBBP8NL	CRNN	RP11-322N21.2	SLC22A2	NR1H4	HBM	ALDH3B2	UGT1A4	XAGE2B	SPRR2B	GRHL2	FGB	GPR119	CACNG2	CFC1	VGLL2	LCE3D	UGT1A10	UTF1	MUC15	CD1B	LRRTM1	PRSS56	NPVF
23	LAD1	KRT33B	USP9Y	SPRR2F	ONECUT1	TRIM40	TCL1A	DEFB4A	CLDN8	KLK9	PSG5	POU3F3	HAND2	LAD1	HTR1A	C8B	ROS1	SERPINB4	TFF1	LYPD2	SST	TH	KLK15	OVOL1	MAGEA3	ALPI	VRTN	OR4D6	HOXA11	ZNF280A	TMEM8C	CPA3
24	CLRN1	IRX1	NBPF6	FAM25A	UGT2B4	PRAC1	PAGE5	S100G	MOG	PGLYRP3	PVALB	UGT3A1	SLC22A6	UBD	SLC17A6	APOA5	XAGE1B	SPRR4	UPK1B	AMY1B	NEUROD1	KCNG4	SI	SLC6A14	MUC7	HIST2H2AA4.1	TPTE	PLA2G2E	OPALIN	TBC1D3L	ALX3	SSX5
25	KLK15	SERPINB13	GP2	ADH7	UGT2B10	TINAG	RNASE7	OTOP3	GFAP	DEFB4A	MMP26	SLC22A24	OR2T10	MAL2	HEPACAM	FGG	BPIFA2	SERPINB12	SPRR2B	CTCFL	PDX1	NOX3	ADAM2	TFF1	SSX1	GATA4	CCDC172	ZIC2	ARPP21	MMP26	OTX2	HSPB2-C11orf52
26	C1orf210	UGT1A1	SERPINA11	KRT13	RP11-569G13.3	XXbac-BPG32J3.19	DUOXA2	SERPINB13	AGR2	CH17-335B8.4	KLK3	GSTA2	UGT1A9	GYPA	SLC22A6	LECT2	PGC	NKX2-1	GGT6	UTY	GJD2	VSTM2A	NLRP8	KLK7	DCT	CMC4	TRIML2	CHIA	CFC1	NLGN4Y	FCRL1	NKX2-4
27	AGR3	CYP4F8	TFF1	SPRR4	SERPINA4	MUC17	MS4A1	LGALS7	SPINK8	SERPINB3	CRH	CDH16	SLC17A4	TCEAL7	CBLC	APOA4	RLN3	TMPRSS11A	KRT23	LRRTM1	CFC1	TBX20	HOXB13	MGC50722	MAGEA6	UGT2A3	NANOGP8	TRPC5	FOXA2	TEX36	SMR3B	ABCB5
28	STAR	IGFL1	C10orf99	IVL	UGT1A9	REG1A	KCNG3	S100A7A	CALML5	RPTN	NMRK2	TMIGD1	CDH9	PTN	SCGB2A1	AHSG	CEACAM5	DSG3	CLDN8	PDYN	CTRB2	PPP1R17	GP2	CD164L2	LCE1F	CEACAM5	NANOG	RSPH6A	HMHB1	PRAME	SELV	HOXA4
29	HMX3	OR10A3	NLGN4Y	S100A7A	HRG	CEACAM5	KISS1	SERPINB4	SCGB2A1	KRT6A	KRT35	NR1H4	SIM1	OR52B6	C5orf46	CRP	XAGE1A	UGT1A7	KCNA4	KLK7	UGT2A3	MARCH11	KCNC2	SPACA4	CDH19	AC011513.3	ALPPL2	PADI3	IYD	EMX2	LBX1	NMRK2
30	KRT6A	DEFB126	SST	TMPRSS11B	HAO1	R3HDML	LY6D	MUC17	LAD1	IVL	CNTNAP5	TM4SF5	UGT3A1	RNF128	HTR5A	CFHR1	B3GNT6	CALML3	OLFM4	SCGB2A1	CPA1	ARHGAP36	ISX	LDLRAD1	LCE2B	GPR128	TEX37	CYP1A2	LCN9	RP11-565P22.6	OTOR	HOXA7
31	RASSF10	AQP4	APOH	SERPINB11	TTR	SPINK4	H2AFB1	FAM25A	HMGCS2	S100A7	TMEM72	RBBP8NL	UGT2B7	PRB4	CACNG3	G6PC	CEACAM6	KRTAP4-1	SERPINA4	WFDC8	TM4SF5	FEV	KRTAP13-2	MAL2	TRIM48	MUC5AC	C3orf56	SPINK1	TMEM235	IRX1	GBX1	MUC7
32	KRT5	UGT1A8	NR1H4	KDM5D	SERPINA6	ALPI	FDCSP	ADH7	ALDH3B2	IL36A	POU3F3	GUCA2B	PAX2	KRT6A	NXPH1	SLCO1B1	C8B	SFTA3	MUC15	FOXI3	G6PC2	OVOL2	TMEFF2	CKMT1B	KPRP	GIF	DSCR8	HHATL	KRT82	SERTM1	SLC18A3	NXNL1
33	AGR2	UGT1A7	NBPF4	C10orf99	F11	NXPE1	MAGEA9	F8A2	SPRR1B	KRT6B	HAND2	CCL15-CCL14	DCAF12L1	RGS4	GABRA1	HRG	APOH	KRT6B	CXCL17	RAX2	GP2	RIT2	ADAM7	PLA2G4F	C1orf68	GP2	DEFB123	LRRC52	ARL5C	DYDC1	SP9	HOXA2
34	SDR16C5	OR10H1	ANKRD30B	TLX3	F9	UGT2A3	NKX2-8	KLK9.1	CST4	CALML5	OR1N1	RNF186	ZCCHC16	NGF	RGR	FABP1	C4BPA	KRT74	CEACAM7	MBD3L1	UGT1A10	DRGX	CLDN8	RAB19	LCE1B	SLC6A19	ZNF729	IYD	CEACAM5	C1orf158	OR52N4	SYNPR
35	SLC34A2	CH17-335B8.4	TMEM210	SERPINB12	UGT2B15	BTNL3	FCRL4	KRT6B	PDYN	ADH7	C14orf105	ALPI	AP003419.11	PAMR1	SOX3	CPN1	LGSN	LCE3E	SPANXC	PRSS1	TFF1	BBOX1	GCG	GGT6	SPRR2G	HIST2H2AA4	DSCR4	OR2T8	HOXC11	GLYATL3	MAGEA9	HOXD10
36	CTSE	UGT1A6	CLEC3A	FAM83C	PDX1	FABP2	DUPD1	KRT6A	C1orf94	LCE1C	FOXI2	AFM	SLC6A19	VPREB1	GABRG2	PRODH2	C10orf99	SERPINB11	KCTD8	ZFY	GAD2	CEACAM6	TMEM210	FOXN1	LCE3E	GC	NEUROG1	TCERG1L	DEFA5	MYBPC1	MYL10	SSX1
37	BBOX1	MAGEA3	CLPSL2	DSG3	UGT2B11	KRTAP5-5	ADAM29	PRSS48	CCL11	CLDN17	NR0B2	ADAM18	SERPINA6	TAS2R60	OLIG1	PLG	SNTN	IVL	UGT2B15	HIST1H1A	SERPINA4	PENK	OR51T1	SCEL	LCE2C	ATOH1	DMRTB1	LCN8	IL36A	FOXA2	GAL3ST3	KRTAP19-1
38	FAM83B	PRR9	CLPS	EIF1AY	FABP1	CEACAM7	C2orf70	CEACAM5	FABP7	SERPINB4	HEPACAM2	UGT2B7	TMIGD1	C8orf4	ZDHHC22	FGF21	RP11-812E19.9	SFTPB	PSAPL1	UGT1A6	TM4SF4	CACNG3	OR51E2	FA2H	RLBP1	S100G	OR7E24	CAPN13	KRT84	DEFB4A	KLRC4	SFTPC
39	KRT14	EDN3	FAM150A	CALML3	CPN1	EPS8L3	PSMA8	SPRR2G	CXCL17	C10orf99	LRRC52	SLC6A19	NYX	SEBOX	GFAP	CFHR4	SLC34A2	S100A7A	ANXA8	WT1	UCN3	TMEM125	CRISP3	KLK12	FOXD3	KRT20	NANOGNB	HOXD13	PABPN1L	CAPSL	XAGE2B	TPSAB1
40	NR1H4	GPR87	CDH16	TMPRSS11A	C14orf105	RNF186	SLITRK6	LCE3E	LRRTM3	PNLIPRP3	GJB6	NAT8	RBBP8NL	CST1	CTAGE4	KNG1	UCN3	MAGEA9	LBX1	KDM5D	CGB5	ALDH3B2	C22orf42	CAPN13	SPRR2B	CYP2C19	ZNF716	ACTL8	CAPN13	UPK1B	KIR3DL2	GGT6
41	AMHR2	HTR2C	EDDM3B	KRT6B	NR1H4	MOGAT3	TTPA	UGT1A10	NTSR2	CARD18	PITX2	REG1A	FSHR	AKR1B10	GABRG1	TTR	BPIFB1	AMTN	SCGB1D2	HIST2H4B	AMY2A	AGR2	IRX4	MSMB	SPRR2E	FABP1	T	HNF4G	DEFA3	AGTR2	LY6G6D	RAB25
42	SEMG1	SPRR2D	CIB3	TMPRSS11D	SPP2	UGT1A10	LCN2	PPIAL4E	FOXN1	SLURP1	ATP6V0A4	HAND2	UMOD	MMP10	SCRT2	UGT1A9	CTSE	CRCT1	SBK2	CRYGB	CGB8	RIPPLY2	OR51S1	CALML3	RDH8	HNF4A	RBMXL2	KCNJ16	MYH8	DCAF12L1	ZIC1	OVOL2
43	CPB1	ANXA8	SERPINA12	KRT4	CYP2C9	SLC17A4	GOLT1A	CARD18	KLK12	KRT14	ASB5	C8orf22	TMEM82	HOXD9	ST8SIA3	TM4SF5	NAPSA	SFTPA2	ELF5	AC006386.1	CELA2A	TFAP2B	CARTPT	EHF	MAGEA12	MUC13	CRYGB	RP11-248J23.7	HOXD13	TMEM114	CTCFL	HOXA6
44	PNLIPRP3	SPERT	NCBP2L	ZFY	ORM1	NXPE4	FAM83B	DSG3	CEACAM5	LGALS7	CEACAM6	FABP7	SLITRK6	OR5B21	SLITRK1	CTB-96E2.2	MUC22	KPRP	CPA1	C20orf85	PNLIPRP1	GJB1	LRRC26	EVPLL	USH1C	MTRNR2L11	ADAD1	GGTLC1	KRT38	LDLRAD1	TBL1Y	RBBP8NL
45	CYP17A1	CGB5	PROL1	AMTN	ALB	ZG16	RGS13	SPRR4	NEUROD1	MYL1	ASCL4	CLEC18C	MMP10	HBG1	CRYGA	APOC4	FAM216B	MSGN1	LRRC31	HIST1H4L	MUC17	GPR123	SPINK8	C1orf210	KISS1	SEMG1	MLN	SSX3	HEMGN	IL19	BTBD17	GRHL2
46	PLA2G4F	SERPINB4	SP8	DDX3Y	F13B	CYP2B6	TOX3	PPIAL4F	FOXG1	IL1F10	CLCNKB	ASB17	AC006994.3	S100G	NEUROD1	UGT1A1	HOXA13	MAGEA6	REN	SERTM1	ST8SIA3	RALYL	SP8	KLK5	LRRC31	PRSS48	TMEM207	TPO	EFNA2	CCDC33	CRABP1	RLBP1
47	KRT13	UPK1A	CLDN8	IGFL1	PAQR9	GIF	KRT23	FCN2	ZBED2	PRR9	UGT2B28	RTP2	TMEM252	HOXD10	SLC32A1	ACSM2B	SLC22A31	MAGEA3	TMPRSS11E	ALPPL2	FGA	DGKK	ASB5	LCN2	LCE2D	H2BFS	GDF3	GABRA6	KRT32	C6orf118	ZNF280A	COX6A2
48	RP11-540D14.8	CAPNS2	MMP27	CTD-2105E13.6	AHSG	REG4	HIST1H4L	HIST2H3A	SLC17A6	FAM83C	TRIM50	SLC27A6	HAVCR1	FHL5	NCAN	RTP3	AGR3	DEFB4A	SPRR3	HIST1H3I	SLC2A2	KIF12	RPS4Y1	SPRR1B	PRDM7	APOA4	DDX53	TSHR	CTD-2105E13.6	C10orf99	PON3	ART1
49	C18orf42	SPRR2A	IL20	HMX2	FGL1	TAS2R38	MAL2	CT83	CEACAM6	TMPRSS11B	SPINK7	GC	TAAR6	PRTN3	TCF21	ADH1A	SLC6A14	H2BFWT	KRT33B	PDCL2	REG4	PABPC1L2B	CEACAM20	UGT1A6	SPRR2D	CTSE	CT83	CLDN8	FOXN1	TMEM211	FOXG1	HOXB8
50	NCBP2L	MAGEA6	KRT37	UTY	PRODH2	CCL15-CCL14	DAZL	GJD3	UGT1A6	AMTN	PSG4	STRA8	KCNV1	TAS2R40	CACNG2	SLC17A1	CXCL17	AGTR2	SYT4	MSLNL	SLC17A4	KRTAP19-1	SEMG2	GPRIN2	NKX2-4	SPINK4	FAM9C	MGAT4C	TTPA	CTD-2370N5.3	VGLL2	ROPN1
51	RBBP8NL	CALML5	HSPB3	SPRR2B	EPS8L3	KRTAP4-1	GJB4	MTRNR2L11	OTOS	WFDC5	UMOD	G6PC	NAT8	TSPAN8	C1orf94	F2	HAND2	WFDC5	C10orf99	KLK9.1	EPS8L3	ANKRD60	TRPM8	FAM83B	LCE6A	TM4SF20	ZSCAN10	HOXB9	C11orf86	AADACL4	ALX1	SMCO2
52	CEACAM5	MAGEA10	HOXC12	C1orf68	ELF5	CEACAM18	C19orf83	PDX1	NKX2-2	IL36RN	MARCH11	PAX2	TM4SF5	C6orf229	TMEM235	SLC17A4	PAX2	LCE1F	GATA4	TRIM43	CRISP3	EHF	BPIFB2	RNF225	RGR	RNF186	SAA2-SAA4	HOXA6	PADI1	CLPSL1	KLRC4-KLRK1	C10orf90
53	NXNL1	MAGEA4	OBP2B	KRT78	RP11-400G3.5	AMELX	TH	F8A3	RFX4	DSG3	KRT6A	RP11-477N12.3	GGTLC2	HSPB8	SNTG1	ACSM2A	WFDC10B	FOXE1	LDLRAD1	OBP2A	NKX2-2	CHGB	CYP2C18	ESRP1	LCE1D	CLDN18	FOXI3	HOXC11	CEACAM7	GDF5OS	PRAME	HTN3
54	CTD-2207O23.12	OR5M11	HNF1B	CSH2	KRTAP1-1	ANKS4B	MISP	TMEM14E	BTBD17	SERPINB12	SCEL	GYPA	KCNJ16	CTD-3222D19.2	FDCSP	SLC22A25	TFAP2D	GPR50	BNC1	TINAG	CASR	KRT6A	RFPL1	SFTA2	TYRP1	CCL15-CCL14	ARGFX	GNGT1	HOXA13	RPL36A-HNRNPH2	TNMD	KRTAP5-2
55	EIF4E1B	MAGEA11	CLDN25	SP9	ADH1A	SOX14	PRR5-ARHGAP8	LYPD2	SNTG1	KRT76	RP11-404P21.8	KLK11	TFF1	TFPI2	NKX2-2	AGXT	WFDC13	S100A7	CBLC	DCAF12L1	ANXA10	AKAP4	EIF1AY	SPRR1A	TRIM63	REG1B	PDCL2	FAM181A	KRT2	PRSS56	RALYL	DPT
56	FGFBP1	SULT2A1	OTOR	KRT34	SLC6A19	GPR128	TNFRSF13B	FAM83C	MAGED4	IL36G	ATP6V0D2	NYX	SERPINA7	OR52K1	ZBED2	ALB	CYP4F2	TMPRSS11F	NPY4R	DYDC1	C14orf105	INSM2	SIX6	PRSS22	C10orf90	ANKS4B	DPPA4	CYP2C18	HOXC10	MBD3L1	LRRTM1	MLANA
57	TNNI1	PSCA	ITIH6	CRNN	SLCO1B1	TFF1	RP11-35N6.1	HIST2H4B	PRR32	LY6D	DMRT2	SLC6A3	MMP13	MUM1L1	SPHKAP	HFE2	FOXA2	LGALS7	SPANXN1	F8A3	CTSE	SLC18A1	C11orf86	SCGB1D2	PMEL	CYP2B6	ESX1	PSG8	KRT72	DLX6	GPR15	SPATA31A1
58	OVOL1	CHRM1	DIRC1	FGFBP1	MBL2	GUCA2B	NAT2	UGT1A7	KRT6A	CALML3	CCKAR	BHMT	SDR16C5	WNT2	IL9	ORM1	PLA2G12B	KRT31	VGLL1	MAGED4	PHGR1	PABPC1L2A	PHGR1	CALML5	MLANA	ANXA10	CGB8	UNC93A	GATA5	PON3	UCMA	TRIM63
59	GML	RIPPLY2	C1orf64	KLK9.1	SFRP5	TEX43	GLOD5	TMPRSS11A	NCAN	TMPRSS11A	IQCF6	CYP4A11	MCCD1	AGR3	FGFBP1	OTC	C9orf135	MAGEA1	BPIFB2	KLK6	HOXD13	SCGB2A1	CHRM1	ARHGAP40	WBSCR28	SERPINA4	MAGEB16	ZIC5	LDLRAD1	RBAK-RBAKDN	DMRT1	AREG
60	HCRTR2	C11orf53	UGT1A6	LYPD2	ACSM2B	HNF4A	TP53AIP1	KRTAP4-1	FAM181A	FAM25C	GJD2	UGT1A6	GRP	DPT	PDYN	SLC22A9	DAW1	CARD18	SLC5A1	SCGB1C1	CPB1	CPLX2	CWH43	GOLT1A	OR2L2	HIST1H4L	BHLHE23	BPIFA2	ROS1	MOGAT1	PAGE2	HOXA9
61	KLHDC7A	SCGN	DCD	LGALS7B	CFHR5	UGT1A8	TDRD5	LY6D	TCF21	IL36B	HTR3B	SCGN	TRPC7	HBD	ARL14	ITIH1	HOXD11	IL36G	RSPO1	DEFB126	DPCR1	TFF1	SLC7A13	CTB-50L17.14	SCGB2A1	SPINK1	FGF4	HOXB13	GSTA2	GMNC	PDCL2	POF1B
62	OVOL2	OR5P3	HOXC13	IL36G	APOB	KLK15	CACNG3	TAS2R38	LDLRAD1	OTOP3	KRT4	OR9Q1	SLC6A14	SERPINB10	ZIC3	RP4-583P15.14	TBX5	MAGEA11	IYD	HIST2H3C	SCGN	SCRT2	UGT2B4	SLC34A2	LCE4A	C6orf222	SPZ1	SERPINA6	KLRF2	KAAG1	LRRC26	CDH19
63	S100A14	GJB6	LMX1B	KRT9	KNG1	SULT1C3	CD5L	C1orf195	PIRT	TMPRSS11D	RHCG	HAO2	C10orf62	OR2G3	UGT2B7	FETUB	AC011513.3	KRT77	MSLNL	PGA5	MUC5AC	SERPINB5	SCGB1A1	LMX1A	SLC45A2	OLFM4	PSKH2	SELV	VTCN1	NPY4R	C10orf71	BBOX1
64	PKP3	UPK2	GDA	NLGN4Y	UGT1A10	AQP12A	AGR3	SERPINB5	SALL3	KRTDAP	CLCA4	SLC6A14	CRABP1	OR2L3	TFF1	F11	FGB	KRT13	KCTD4	LHX1	SPINK1	CYP24A1	NCBP2L	CLDN3	S100A7A	DPCR1	SLC7A3	TMEM215	AADAC	TMSB4Y	BPIFB4	C1orf186
65	KLK6	SYT13	AGR3	DEFB4A	CYP2B6	TMIGD1	OR6S1	HIST2H3C	OLIG1	KRT16	RSPO1	HAVCR1	UGT1A6	OR2B11	GPR123	SLC22A7	SPINK14	IL36RN	VGLL2	OBP2B	CEACAM7	FGFBP1	GPX5	CST1	PLP1	PSAPL1	ZCCHC16	SERPINA4	CCR9	PHGR1	SIRPD	PRSS22
66	IYD	ARL14	UMOD	KRT16	CFHR1	LY6G6F	AKR1B10	OR10A2	PLA2G4F	LCE2C	KRTAP5-8	QRFPR	LECT2	OR2L2	GAD2	SERPINA4	ANKRD66	KRT5	HAS1	UGT1A1	OLFM4	TMPRSS2	CYP4F8	SLC13A2	SLC6A15	ARL14	SPAM1	KCNK16	SLC5A1	PAGE4	ZIC4	CCL11
67	NTSR2	KRT9	PRLH	SPRR2G	CEACAM7	TRIM15	FCRL2	IL36G	CALML3	KRT75	TTR	CALML5	PLA2G3	DDI1	RFX4	SERPINA11	MS4A15	DEFB126	SCGN	S100G	CRCT1	RAB19	UTY	ZIC4	ABCB5	TRIM15	MAGEB3	TBX22	SPIC	FOXL2NB	DPYSL5	MUC13
68	CLEC4M	PGLYRP3	IRX1	SCGN	CPB2	SCGB1D2	FCRL1	RP11-234B24.6	SOX1	LCE1B	MOG	AVPR1B	FOXD3	IFNK	TMEM196	SERPINA6	PAEP	TMPRSS11D	MS4A8	TMEM88B	FAM181A	TCEAL6	USP9Y	KLK8	MRGPRX3	BTNL3	SFTPA2	XXbac-BPG32J3.20	KRT74	FOXG1	SLC7A3	RGR
69	FCN2	KRT77	TINAG	KRT5	SLC13A1	IL17A	ODF1	FGFBP1	NXPH1	LIPK	LRRC14B	FGB	AADAC	MT1M	CEACAM6	FGL1	FEZF1	CALML5	TOX3	LIMS3L	CEACAM18	KRT6B	ZFY	CST4	KRT6C	MOGAT3	FTHL17	MUC21	IGLL1	KIAA0408	LRRTM3	MB
70	RAB19	LIPK	TMSB4Y	GPR87	SLC17A3	LY6G6E	SULT4A1	PPIAL4D	MAGED4B	TMPRSS11F	CALCA	PLA2G12B	SERPINB5	ANKRD63	NKX6-2	PAQR9	HOXD13	FAM83C	PTPRQ	EMX2	FGF19	HMGCS2	MS4A18	NCMAP	ASB11	GJD3	PTH2	SFTPB	SPINK1	CDH19	TAS2R3	ATP11AUN
71	SLC6A14	GUCA2A	SIM1	MUC21	APOA4	MEP1A	LIM2	RETNLB	CTB-102L5.4	GAST	AADAC	C18orf63	KCTD4	CST2	CSF2	HPR	MUC15	GKN2	GP2	FEZF2	NKX2-3	NXPH1	ACPP	CRB3	MDGA2	PGA3	VSTM2B	HOXC13	SLC6A14	DMRT1	VSTM2B	GPR87
72	CYP21A2	KPRP	MS4A18	USP9Y	GATA4	DSG4	HIST1H3I	KRT4	FEZF2	KRT34	SLC7A13	CST4	QRFPR	KLK6	HMX1	UGT2A3	AQP4	FGFBP1	CLCA4	MUC16	ARL14	SLC7A14	APOF	C10orf99	TCF21	UGT1A1	HYAL4	MRGPRE	MC2R	TBX5	SST	MMP7
73	KRT6B	TMEM132D	DAW1	KRTAP4-1	ACSM2A	C6orf222	VPREB1	KPRP	SOX3	LCE1A	PIP	SLC22A8	STRA8	OR56B1	OR4N2	UGT1A3	BMP5	UGT1A6	OR14I1	OPN1LW	UGT2B15	DBH	SALL3	TMPRSS7	SFTPC	CCL15	CETN1	CYP4F2	FRMD1	CELA3B	MAGEA4	OTX2
74	VTCN1	FBN3	PF4	KPRP	MUCL1	TM4SF20	IL1RAPL2	CEACAM7	MUC15	FGFBP1	GCGR	SLC28A1	HAO2	C20orf173	FOXG1	APOB	COL6A5	GPR87	EPS8L3	VGLL1	GUCA2B	CEACAM5	MYBPC1	CEACAM7	LCE1C	SLC17A4	CRYGC	FAM150A	SYT13	AVPR1B	ZNF679	ANKRD30B
75	TUBAL3	TMPRSS11E	BPIFB2	KRT75	IGFBP1	LCN15	IGSF5	CYP2C18	DBX2	SERPINB11	PSG8	CTC-360G5.8	ADAM7	FOXQ1	SALL3	AKR1C4	CSF2	TMPRSS11E	DAW1	ALPP	SLC30A8	CRYBA2	OR51F2	C8orf22	SERPINA12	CAPSL	BOD1L2	SSTR5	NKX2-4	ADAMTS19	WIF1	SMIM22
76	ATP2B3	SNTG1	TMEM244	KRT74	SULT2A1	CCL15	GJB5	C10orf99	SLC32A1	SBSN	KRT13	SERPINA6	FGF10	DEFA4	PLA2G4F	AGXT2	IL37	GAST	GLOD5	MTRNR2L11	PAX4	ACTL6B	FOXB2	AZGP1	HTN1	CEACAM7	AVP	BEST3	SERPINA3	IRX4	KERA	ACSM1
77	CALML3	KRT4	NKX2-1	LCE1B	ITIH1	AQP12B	RP11-691N7.6	SLURP1	KDF1	CASP14	TFF1	SLC5A8	UGT2B11	SIGLECL1	PRLHR	CPN2	FGL1	NTS	CFHR1	SSTR5	FFAR1	GJB2	AADAC	ZIC1	CLDN3	F8A2	HOXB1	GGTLC2	GABRA4	AQP2	ASB10	HNF4G
78	NMRK2	SPRR4	HNF4A	CEACAM7	NR0B2	TCP10	BTC	SI	CTSE	NLRP10	S100A7	LRRC26	MMP3	PLA2G2A	AGR2	SMLR1	POU3F3	KLK3	UGT2B11	FABP7	RP11-400G3.5	CDH18	GNGT1	PRSS8	CAPSL	NR0B2	SAA4	RP11-249C24.12	DUX4	CHURC1-FNTB	COL2A1	KCNJ13
79	CYP11A1	ALPP	KERA	KRT14	AADAC	VIL1	CLDN2	TMPRSS11D	SCRT2	KRT5	ANXA8	LYZL1	SCGN	IL20RA	MSMB	CYP2C9	LRIT2	AADACL2	PIP	IVL	SYT4	KCNH5	NDST4	GJB6	MYL10	RP11-1220K2.2	SLURP1	RIIAD1	CYP4F11	SPATS1	AP000350.10	RD3L
